# Supplementary material for: Total synthesis of MECA-79
Source: Royal Society of Chemistry journal article supplement (doi:10.1039/c4ra12631a), 2014-01-01

## Supporting Information

### Total Synthesis of MECA-79

Archanamayee Behera, Madhu Emmadi and Suvarn S. Kulkarni\*

Department of Chemistry, Indian Institute of Technology Bombay,

Mumbai 400076, India.

[suvarn@chem.iitb.ac.in](mailto:suvarn@chem.iitb.ac.in)

| <b>Table of Contents</b>                                                | <b>Pages</b> |
|-------------------------------------------------------------------------|--------------|
| List of contents.....                                                   | S1-S3.       |
| <sup>1</sup> H NMR spectrum of compound <b>3</b> .....                  | S4.          |
| <sup>13</sup> C NMR spectrum of compound <b>3</b> .....                 | S5.          |
| <sup>1</sup> H- <sup>1</sup> H COSY spectrum of compound <b>3</b> ..... | S6.          |
| <sup>1</sup> H NMR spectrum of compound <b>4</b> .....                  | S7.          |
| <sup>13</sup> C NMR spectrum of compound <b>4</b> .....                 | S8.          |
| <sup>1</sup> H- <sup>1</sup> H COSY spectrum of compound <b>4</b> ..... | S9.          |
| <sup>1</sup> H NMR spectrum of compound <b>6</b> .....                  | S10.         |
| <sup>13</sup> C NMR spectrum of compound <b>6</b> .....                 | S11.         |
| <sup>1</sup> H- <sup>1</sup> H COSY spectrum of compound <b>6</b> ..... | S12.         |
| <sup>1</sup> H NMR spectrum of compound <b>7</b> .....                  | S13.         |
| <sup>13</sup> C NMR spectrum of compound <b>7</b> .....                 | S14.         |
| <sup>1</sup> H- <sup>1</sup> H COSY spectrum of compound <b>7</b> ..... | S15.         |
| <sup>1</sup> H NMR spectrum of compound <b>9</b> .....                  | S16.         |

|                                                                           |      |
|---------------------------------------------------------------------------|------|
| <sup>13</sup> C NMR spectrum of compound <b>9</b> .....                   | S17. |
| <sup>1</sup> H- <sup>1</sup> H COSY spectrum of compound <b>9</b> .....   | S18. |
| <sup>1</sup> H NMR spectrum of compound <b>10</b> .....                   | S19. |
| <sup>13</sup> C NMR spectrum of compound <b>10</b> .....                  | S20. |
| <sup>1</sup> H- <sup>1</sup> H COSY spectrum of compound <b>10</b> .....  | S21. |
| <sup>1</sup> H NMR spectrum of compound <b>11</b> .....                   | S22. |
| <sup>13</sup> C NMR spectrum of compound <b>11</b> .....                  | S23. |
| <sup>1</sup> H- <sup>1</sup> H COSY spectrum of compound <b>11</b> .....  | S24. |
| <sup>1</sup> H NMR spectrum of compound <b>13</b> .....                   | S25. |
| <sup>13</sup> C NMR spectrum of compound <b>13</b> .....                  | S26. |
| <sup>1</sup> H- <sup>1</sup> H COSY spectrum of compound <b>13</b> .....  | S27. |
| <sup>1</sup> H NMR spectrum of compound <b>14</b> .....                   | S28. |
| <sup>13</sup> C NMR spectrum of compound <b>14</b> .....                  | S29. |
| <sup>1</sup> H- <sup>1</sup> H COSY spectrum of compound <b>14</b> .....  | S30. |
| <sup>1</sup> H NMR spectrum of compound <b>16</b> .....                   | S31. |
| <sup>13</sup> C NMR spectrum of compound <b>16</b> .....                  | S32. |
| <sup>1</sup> H- <sup>1</sup> H COSY spectrum of compound <b>16</b> .....  | S33. |
| <sup>1</sup> H NMR spectrum of compound <b>17</b> .....                   | S34. |
| <sup>13</sup> C NMR spectrum of compound <b>17</b> .....                  | S35. |
| <sup>1</sup> H- <sup>13</sup> C COSY spectrum of compound <b>17</b> ..... | S36. |
| <sup>1</sup> H NMR spectrum of compound <b>18</b> .....                   | S37. |
| <sup>13</sup> C NMR spectrum of compound <b>18</b> .....                  | S38. |
| <sup>1</sup> H NMR spectrum of compound <b>19</b> .....                   | S39. |

|                                                          |      |
|----------------------------------------------------------|------|
| <sup>13</sup> C NMR spectrum of compound <b>19</b> ..... | S40. |
| <sup>1</sup> H NMR spectrum of compound <b>20</b> .....  | S41. |
| <sup>13</sup> C NMR spectrum of compound <b>20</b> ..... | S42. |
| <sup>1</sup> H NMR spectrum of compound <b>1</b> .....   | S43. |
| <sup>13</sup> C NMR spectrum of compound <b>1</b> .....  | S44. |

SSK-6-ME-216-1H

NAME SSK-6-ME-216-1H  
 EXPNO 23  
 PROCNO 1  
 Date\_ 20110521  
 Time\_ 16.05  
 INSTRUM spect  
 PROBHD 5 mm PABBO BB-  
 PULPROG zg30  
 TD 65536  
 SOLVENT CDCl3  
 NS 40  
 DS 0  
 SWH 8223.685 Hz  
 FIDRES 0.129483 Hz  
 AQ 3.9846387 sec  
 RG 57  
 DW 60.800 usec  
 DE 6.50 usec  
 TE 294.8 K  
 D1 1.00000000 sec  
 TD0 1

===== CHANNEL f1 =====  
 NUC1 1H  
 P1 13.50 usec  
 PL1 -1.00 dB  
 PL1W 10.56200695 W  
 SFO1 400.1324710 MHz  
 SI 32768  
 SF 400.1300121 MHz  
 WDM EM  
 SSB 0  
 LB 0.30 Hz  
 GB 0  
 PC 1.00

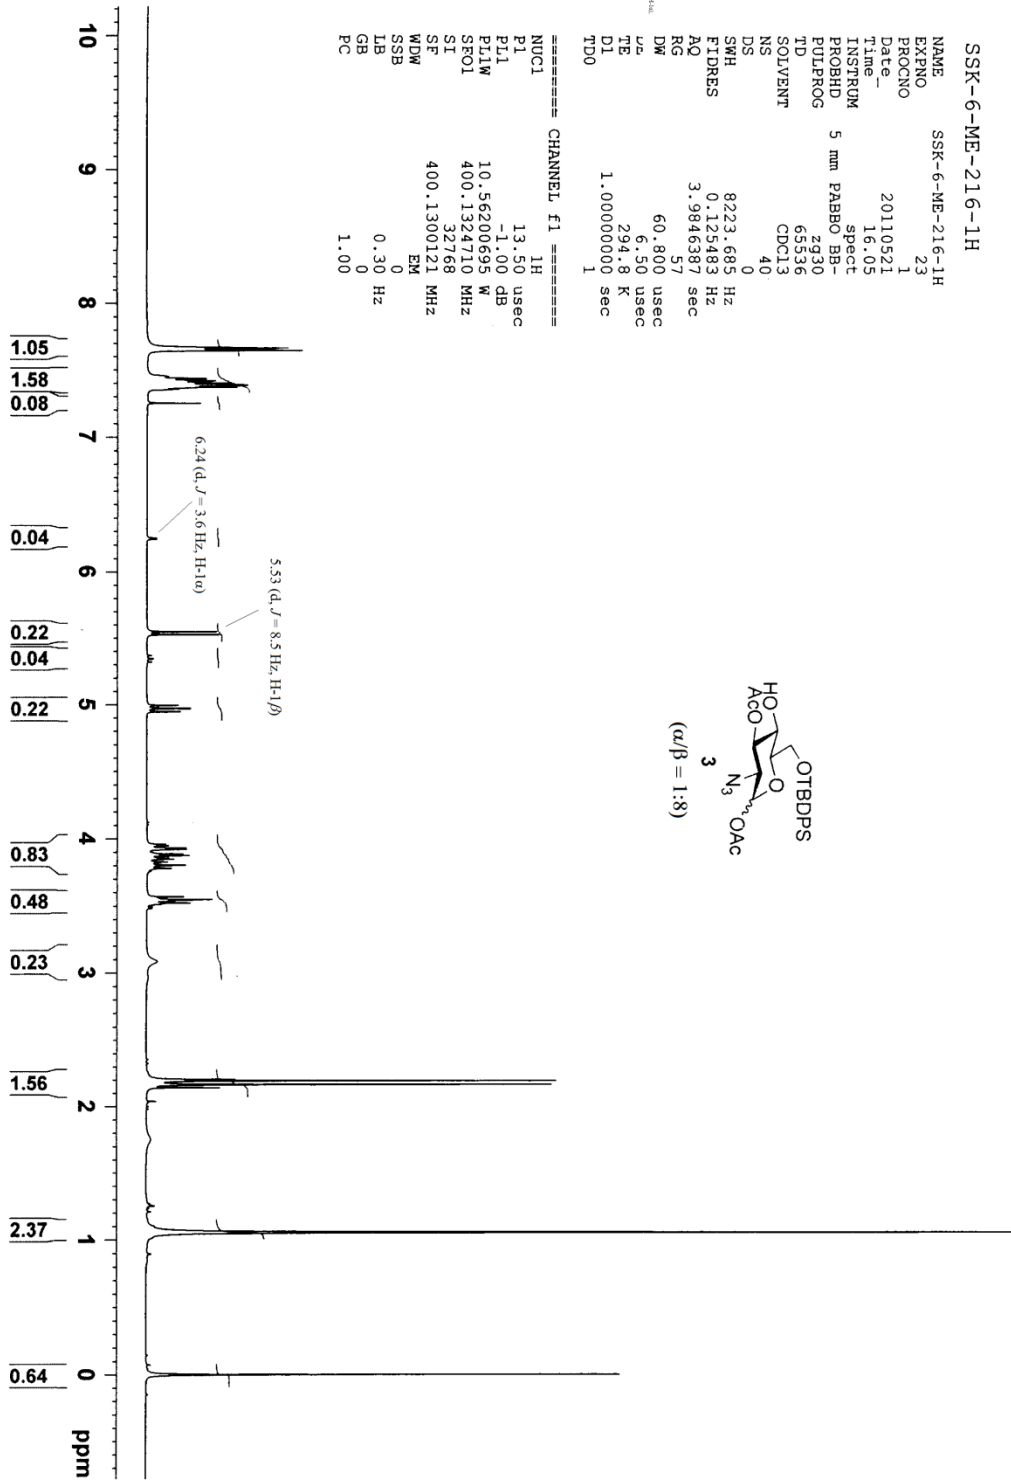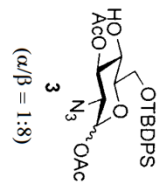

SSK-6-ME-216-13C

NAME SSK-6-ME-216-13C  
 EXPNO 24  
 PROCNO 2  
 Date\_ 20110521  
 Time\_ 16:10  
 INSTRUM spect  
 PROBD 5 mm PABBO-RR-  
 PULPROG zgpg30  
 TD 65536  
 SOLVENT CDCl3  
 NS 117  
 DS 4  
 SMH 24038.461 Hz  
 FIDRES 0.366798 Hz  
 AQ 1.3631988 sec  
 RG 2050  
 DW 20.800 usec  
 DE 6.50 usec  
 TE 295.5 K  
 D1 1.00000000 sec  
 D11 0.03000000 sec  
 TD0 1

==== CHANNEL f1 =====  
 NUCL1 13C  
 P1 8.75 usec  
 PL1 -2.00 dB  
 PL1W 56.53121948 W  
 SFO1 100.6228298 MHz

==== CHANNEL f2 =====  
 CPDPRG2 waltz16  
 NUCL2 1H  
 P2 80.00 usec  
 PCPDZ -1.00 dB  
 PL2 14.50 dB  
 PL2W 10.5620695 W  
 PL12W 0.23767781 W  
 SFO2 400.1316008 MHz  
 ST 100.612759 MHz  
 SF 100.612759 MHz  
 WDW EM  
 SSB 0  
 LB 1.00 Hz  
 GB 0  
 PC 1.40

171.20  
 168.81  
 135.81  
 135.72  
 132.79  
 130.13  
 130.09  
 127.99  
 127.92  
 92.80  
 90.46  
 77.52  
 77.20  
 76.88  
 75.75  
 75.53  
 73.45  
 70.55  
 64.05  
 62.75  
 26.96  
 21.11  
 21.04  
 19.38  
 0.15

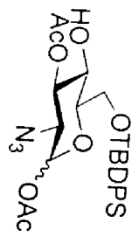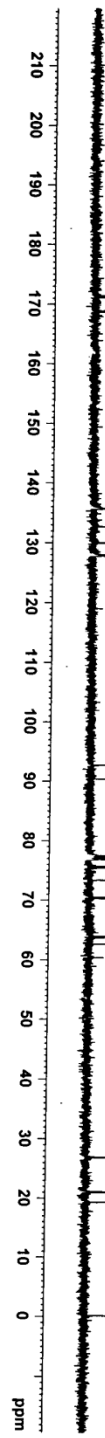



SSK-6-ME-278-1H

NAME SSK-6-ME-278-1H  
 EXNO 22  
 PROCNO 1  
 Date 20110520  
 Time 13.41  
 INSTRUM 5 mm PABBO BB-  
 PROBHD spect  
 PULPROG zg30  
 TD 65536  
 SOLVENT CDCl3  
 NS 20  
 DS 0  
 SWH 8223.685 Hz  
 FIDRES 0.125483 Hz  
 AQ 3.9846387 sec  
 RG 32  
 DM 60.800 usec  
 DE 6.50 usec  
 TE 295.4 K  
 D1 1.00000000 sec  
 TD0 1

===== CHANNEL f1 =====  
 NUCL 1H  
 P1 13.50 usec  
 PL1 -1.00 dB  
 PL1W 10.56200695 W  
 SF01 400.1324710 MHz  
 SI 32768  
 SF 400.1300094 MHz  
 WDW EM  
 SSB 0  
 LB 0.00 Hz  
 GB 0  
 PC 1.00

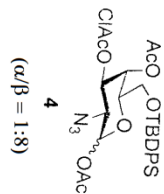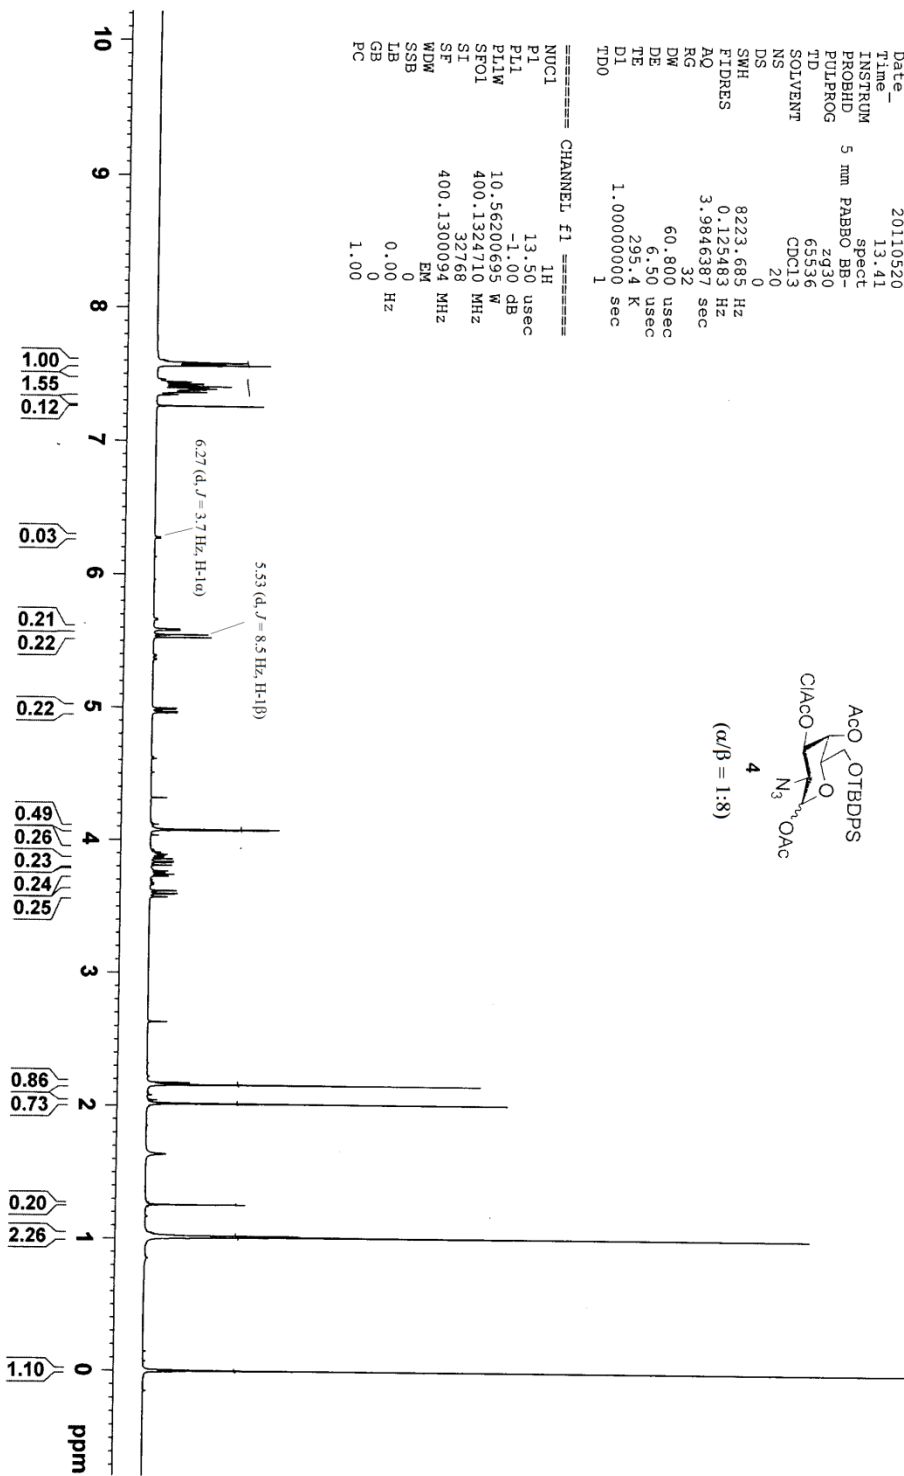

SSK-6-ME-278-13C

NAME SSK-6-ME-278-13C  
 EXPNO 23  
 PROCNO 1  
 Date\_ 20110520  
 Time 13.45  
 INSTRUM Spect  
 PULPROG 5 mm PABBO  
 TD 4096  
 SOLVENT DMSO  
 NS 300  
 DS 2  
 SWH 27173.912 Hz  
 FIDRES 0.414641 Hz  
 AQ 1.2059124 sec  
 RG 912  
 DM 18.400 usec  
 DE 6.50 usec  
 TE 296.2 K  
 D1 1.00000000 sec  
 D11 0.03000000 sec  
 TDO 1

===== CHANNEL f1 =====  
 NUC1 13C  
 P1 8.75 usec  
 PL1 -2.00 dB  
 PL1W 56.53121948 W  
 SFO1 100.6238364 MHz  
 ===== CHANNEL f2 =====  
 CPDPRG2 waltz16  
 NUC2 1H  
 PCPD2 80.00 usec  
 PL2 -1.00 dB  
 PL12 14.50 dB  
 PL13 14.50 dB  
 PL14 14.50 dB  
 PL15 10.56200695 W  
 PL16 0.2667781 W  
 PL17 0.2667781 W  
 SFO2 400.1316001 MHz  
 SF 100.6127537 MHz  
 WDW EM  
 SSB 0  
 LB 1.00 Hz  
 GB 0  
 PC 1.40

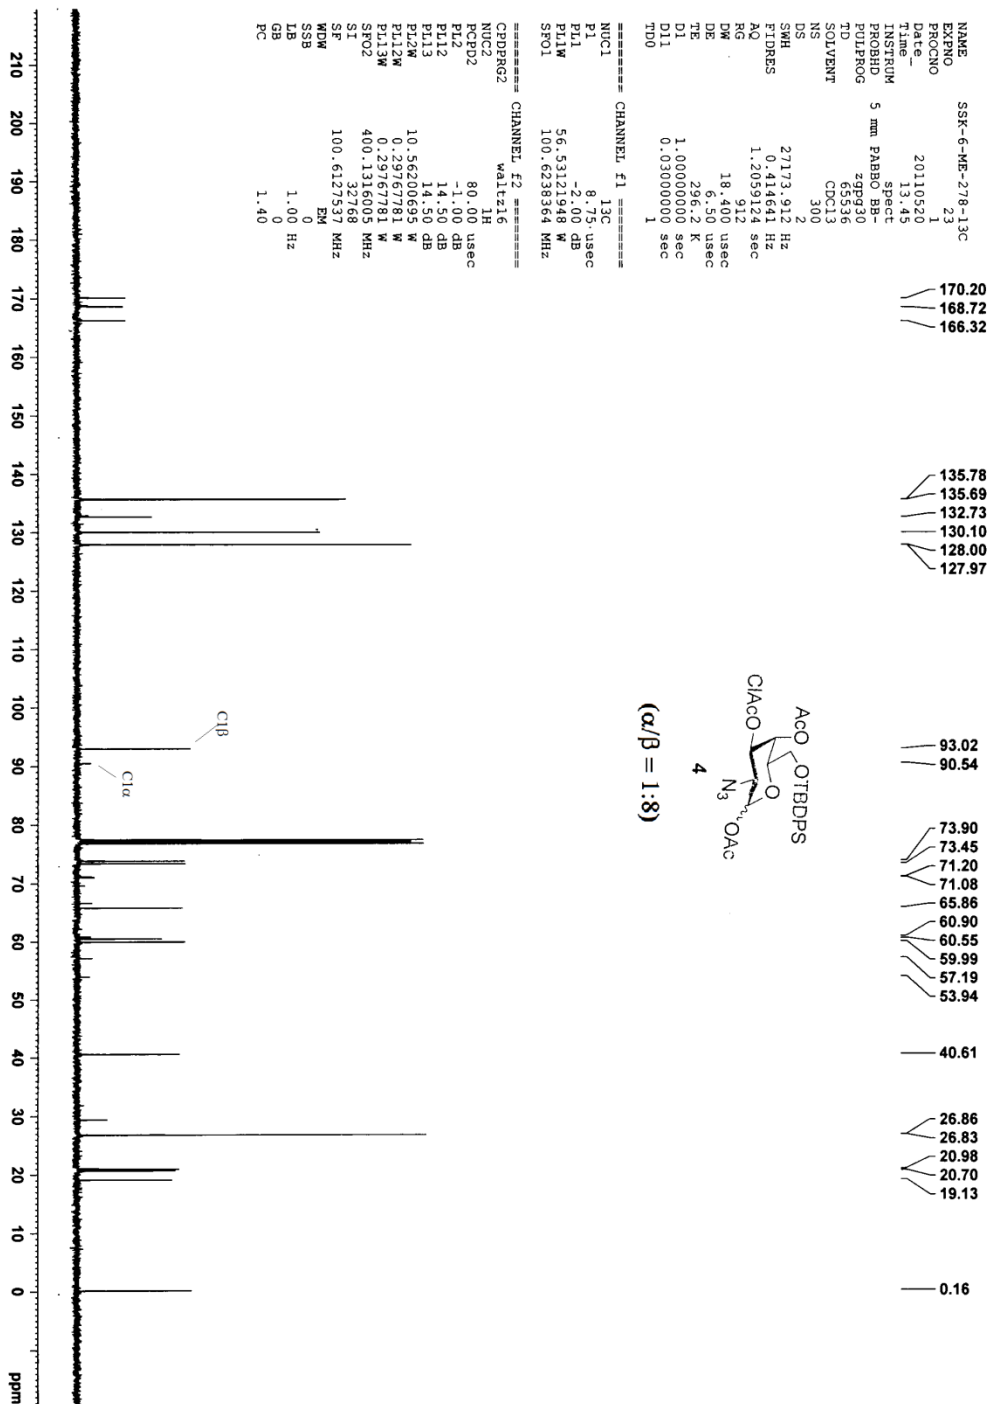



SSK-6-ME-278-COSY

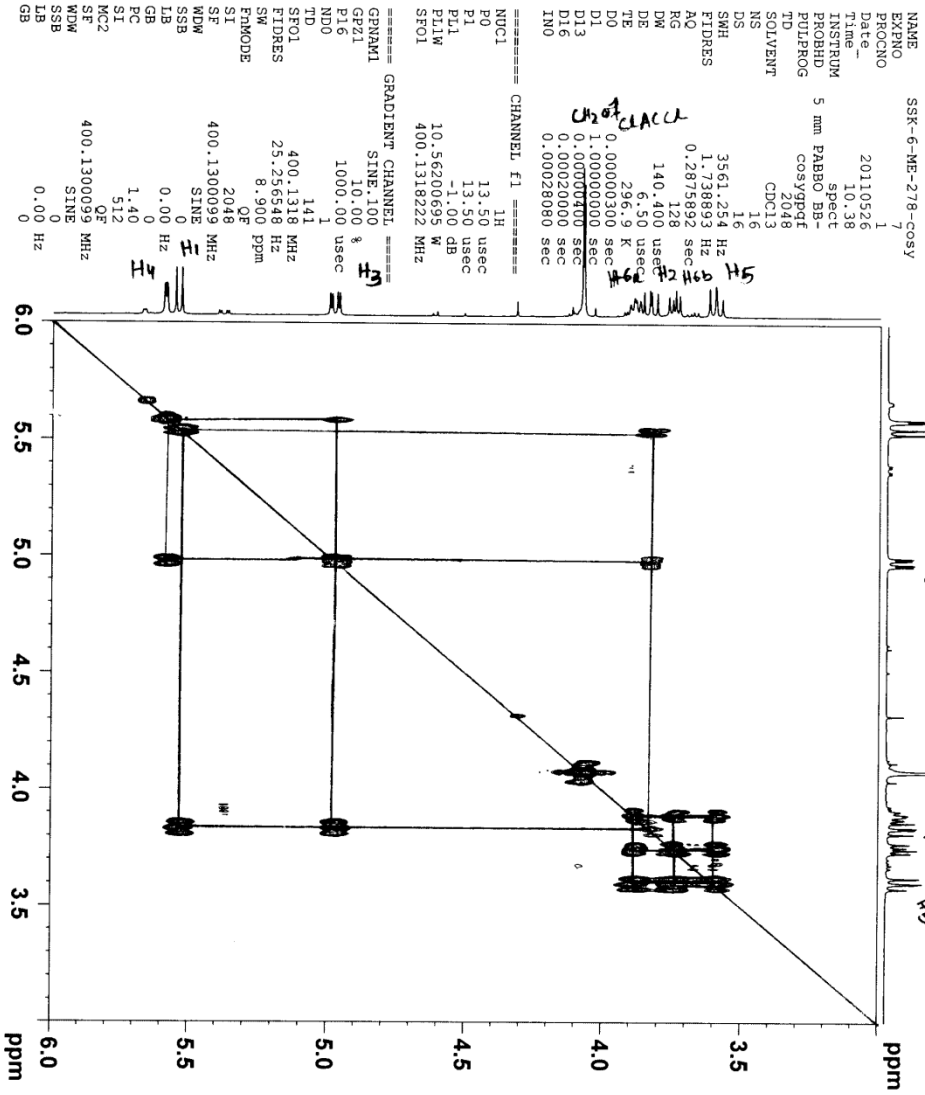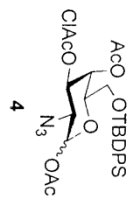

```

NAME SSK-6-ME-278-cosy
EXPNO 1
PROCNO 1
Date_ 20110526
Time 10:38
INSTRUM spect
PROBHD 5 mm PABBO BB-
PULPROG cosygprf4
TD 42048
SOLVENT CDCl3
NS 16
DS 16
SWH 3561.254 Hz
FIDRES 1.739893 Hz
AQ 0.2879892 sec
RG 140.128
DM 140.400 usec
DE 26.50 K
TE 0.0000300 sec
D0 1.00000000 sec
D1 0.00000400 sec
D12 0.00020000 sec
D16 0.00028080 sec
IN0 0.00028080 sec

===== CHANNEL f1 =====
NUC1 1H
P1 13.50 usec
PL1 13.50 usec
PL12 1.00 dB
PL1W 10.56200695 W
SF01 400.1318222 MHz

===== GRADIENT CHANNEL =====
GENAMI SINE:100
SFZ1 10.00 %
F16 1000.00 usec
ND0 1
TD 141
SF01 400.1318 MHz
FIDRES 25.256548 Hz
SN 8.900 ppm
F2MODE QF
SI 2048
SF 400.1300099 MHz
WDW SINE
SSB 0
LB 0.00 Hz
GB 0
FC 1.40
SI2 QF
SC 400.1300099 MHz
SHW SINE
SFB 0
GB 0.00 Hz
  
```

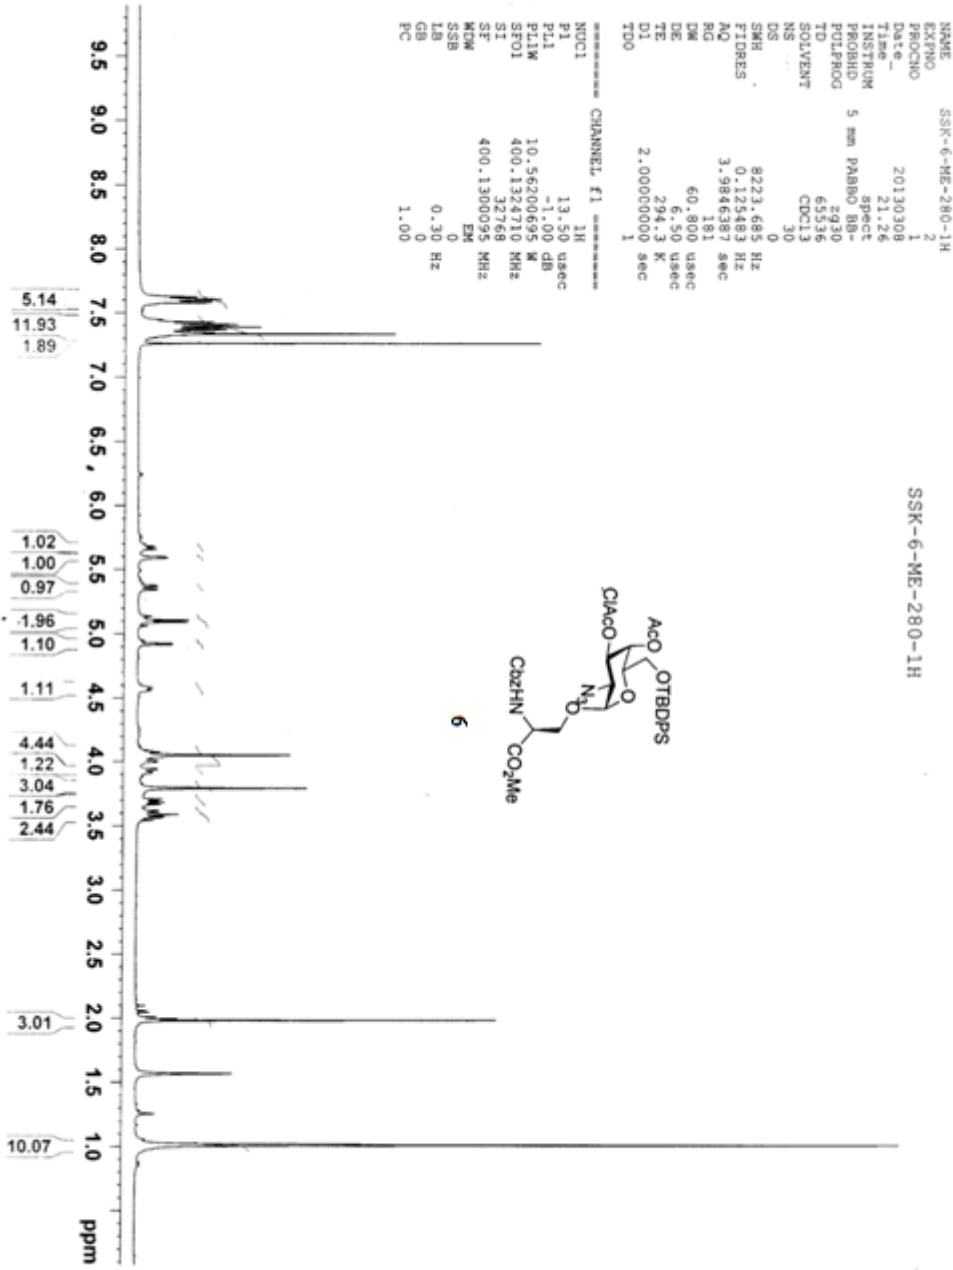

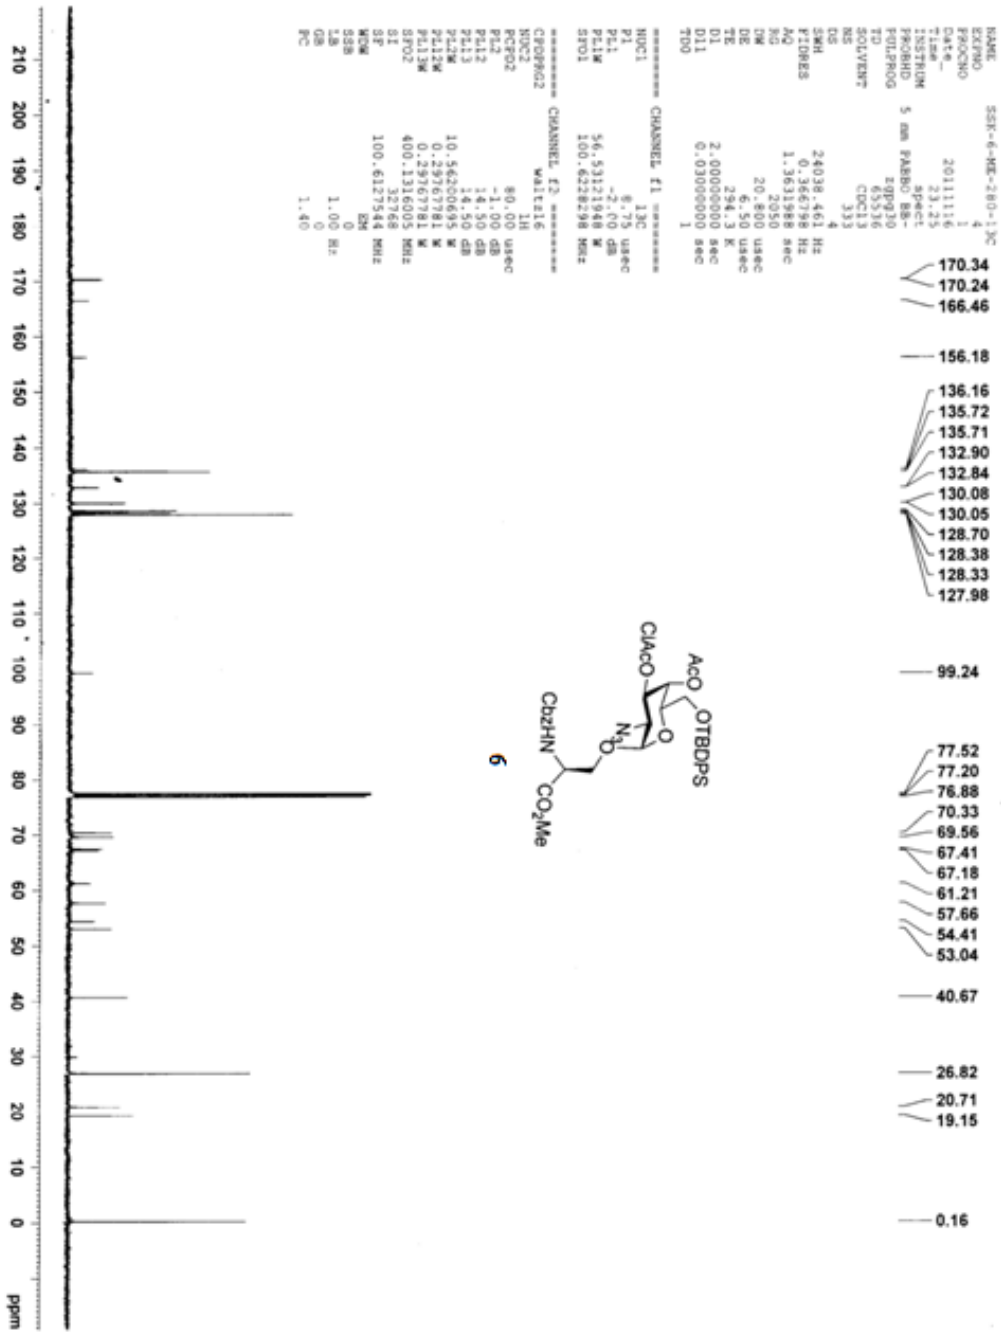

SSK-6-ME-280-1H FOR COSY

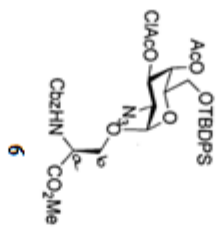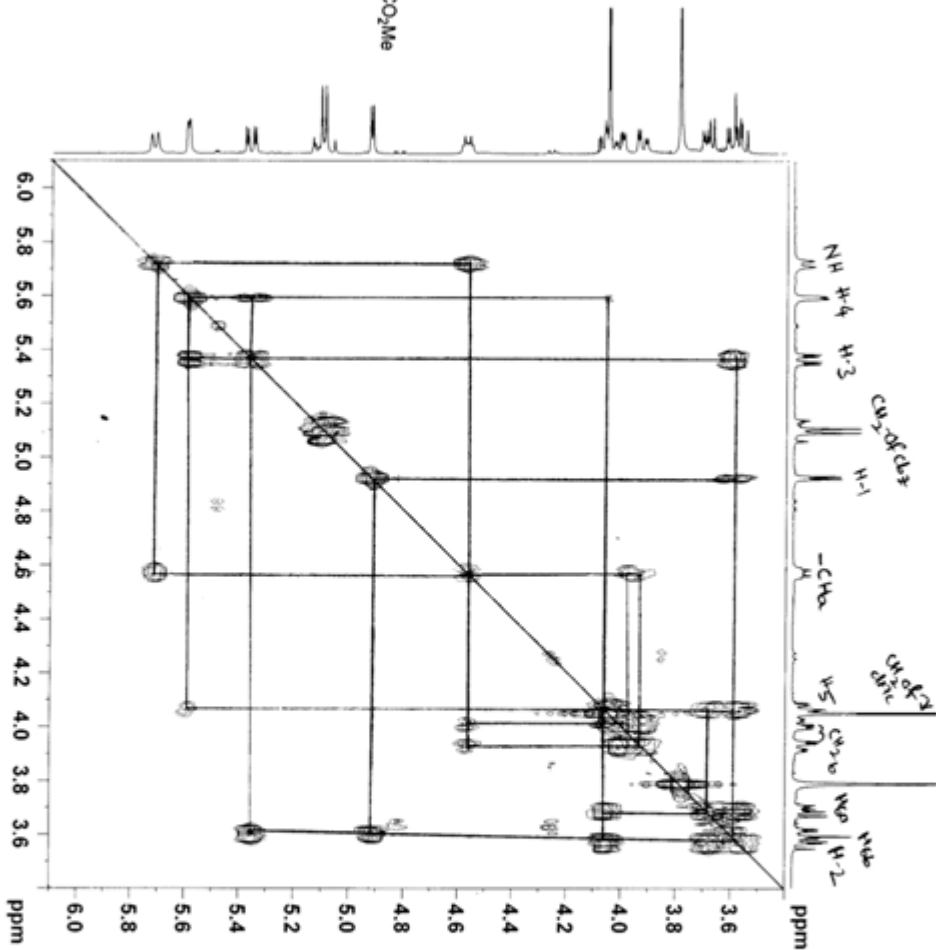

```

NAME          SSK-6-ME-280-1H COSY
EXPNO         64
PROCNO        2
F2          20110618
Date_         11
Time          1.47
INSTRUM       spect
PROBHD        5 mm PASAD BB-
PULPROG       coesypppgf
TD            2048
SOLVENT       CDCl3
NS            100
DS            16
SMR           3612.717 Hz
FIDRES       1.764022 Hz
AQ           0.2834932 sec
RG            203
DE           138.400 usec
TE           294.2 K
DO           0.00003100 sec
D1           1.00000000 sec
D13          0.00000400 sec
D16          0.00020000 sec
IR0           0.00027680 sec

***** CHANNEL F1 *****
NUC1          13
P1            13.20 usec
PL1           -1.00 dB
P1LW         10.36200695 W
SFO1         400.1315961 MHz

***** GRADIENT CHANNEL *****
GPRM1        SINE.100
GP21         10.00 %
P16          1000.00 usec
NCO          1
TD1          181
SFO1         400.1315 MHz
SFORS        19.319258 Hz
SFORES       9.00000000 Hz
PDMODER      SF
SF           400.1300099 MHz
SINE         SINE
SSA          0
LB           0.00 Hz
GB           0
PC           1.40
SI           0
SF2          400.1300000 MHz
SFO2         SINE
MVD          0
SDB          0
LB           0.00 Hz
GB           0
  
```

SSK-6-ME-856-1H

NAME SSK-6-ME-856-1H  
 EXPNO 1  
 PROCNO 1  
 Date\_ 20130329  
 Time\_ 0.10  
 INSTRUM spect  
 PROBHD 5 mm PABBO BB-  
 PULPROG zg30  
 TD 65536  
 SOLVENT CDCl3  
 NS 30  
 DS 0  
 SWH 8223.685 Hz  
 FIDRES 0.125483 Hz  
 AQ 3.9846387 sec  
 RG 128  
 DW 60.800 usec  
 DE 6.50 usec  
 TE 293.5 K  
 D1 1.00000000 sec  
 TDO 1

===== CHANNEL f1 =====  
 NUC1 1H  
 P1 13.50 usec  
 PL1 -1.00 dB  
 PL1W 10.56200695 W  
 SFO1 400.1324710 MHz  
 SI 32.768  
 SF 400.1300095 MHz  
 WDW EM  
 SSB 0  
 LB 0.30 Hz  
 GB 0  
 PC 1.00

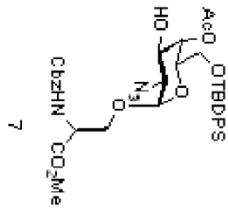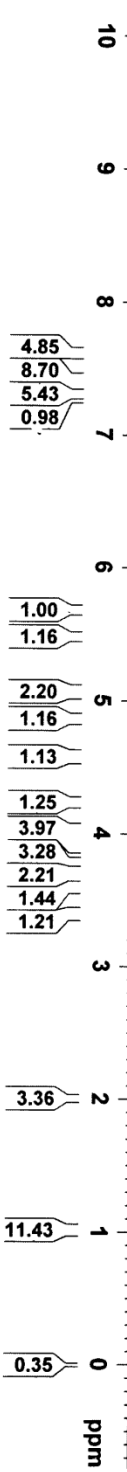

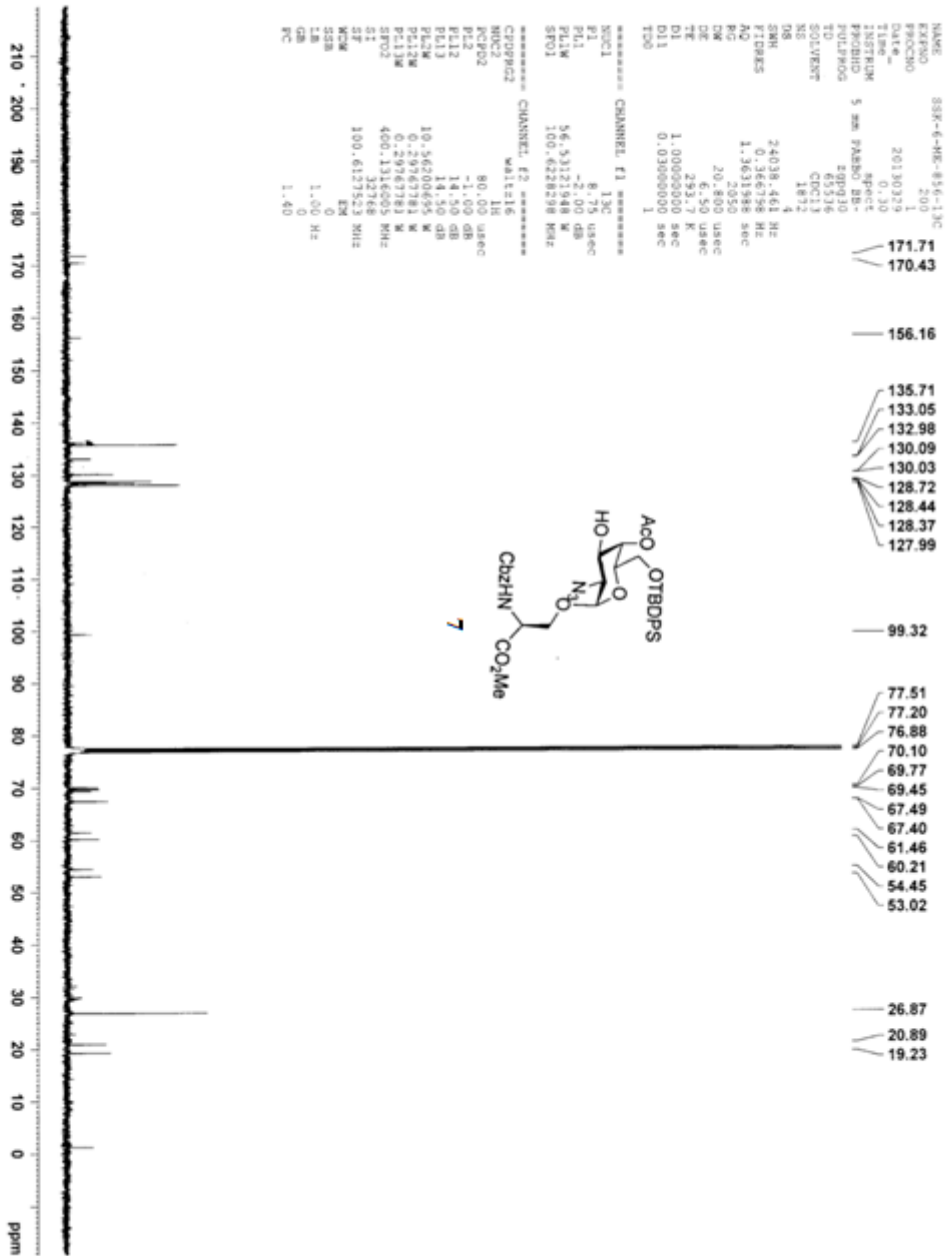



SSK-11-AMB-114-1H-

NAME SSK-11-AMB-114-1H-  
EXPNO 999  
PROCNO 1  
Date\_ 20140612  
Time\_ 22.17  
INSTRUM spect  
PROBHD 5 mm SEI 1H/D-  
PULPROG zg30  
TD 65536  
SOLVENT CDCl3  
NS 21  
DS 0  
SWH 8223.685 Hz  
FIDRES 0.125483 Hz  
AQ 3.9846387 sec  
RG 90.5  
DW 60.800 usec  
DE 6.50 usec  
TE 296.0 K  
D1 1.00000000 sec  
TD0 1

===== CHANNEL f1 =====  
NUC1 1H  
P1 13.50 usec  
PL1 -1.00 dB  
PL1W 10.56200695 W  
SFO1 400.1324710 MHz  
SI 32768  
SF 400.1300095 MHz  
WDW EM  
SSB 0  
LB 0.30 Hz  
GB 0  
PC 1.00

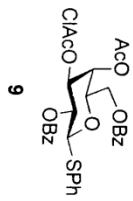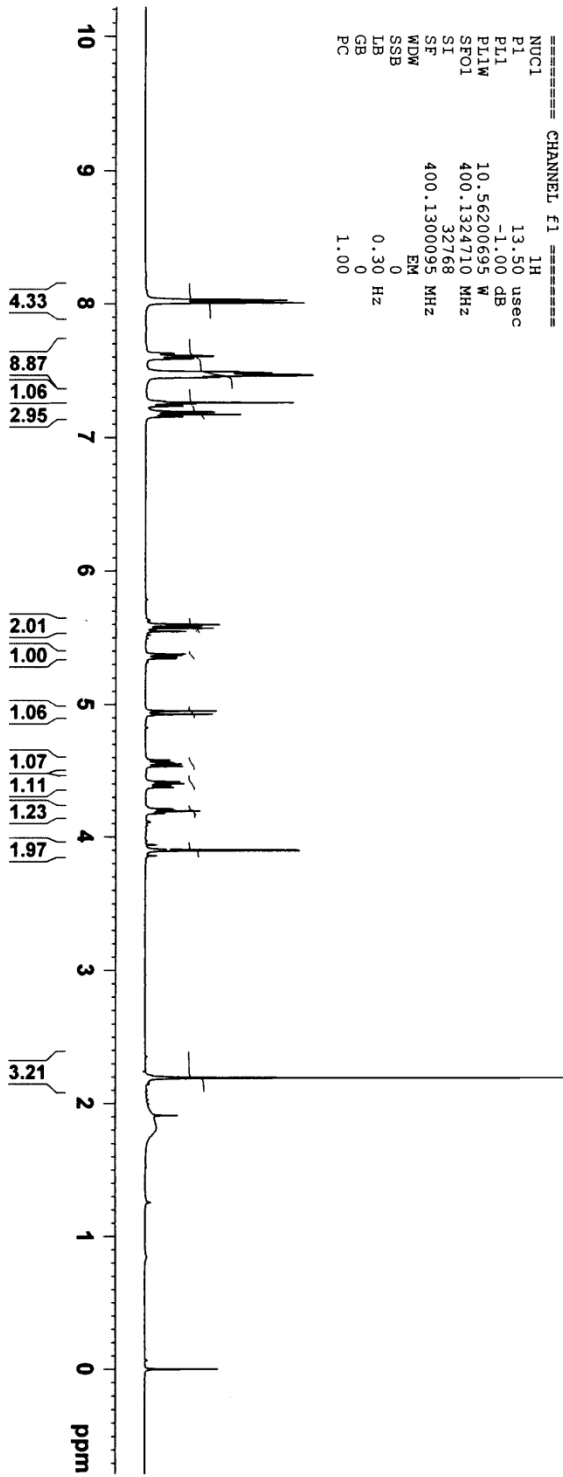



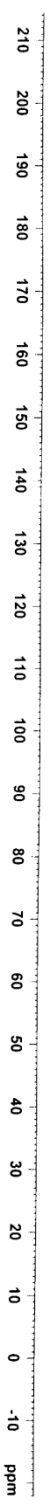

170.59  
166.81  
166.16  
165.38

133.81  
133.62  
132.77  
132.64  
130.08  
129.95  
129.48  
129.21  
129.08  
128.76  
128.71  
128.38

SSK-11-AMB-114-13C

87.23  
77.45  
77.20  
76.95  
74.77  
73.92  
67.81  
67.58  
62.34

40.51

20.88

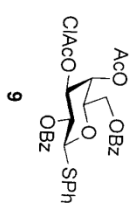

Current Data Parameters  
 NAME SSK-11-AMB-114-13C  
 EXPNO 9  
 PROCNO 1

F2 - Acquisition Parameters  
 Date\_ 20140613  
 Time 23.17  
 INSTRUM spect  
 NS14HD 5 mm PABBO  
 PULPROG zgpg30  
 TD 65536  
 SFO1 125.770637 MHz  
 SOLVENT DMSO  
 NS 585  
 DS 4  
 SWH 29761.904 Hz  
 FIDRES 0.454131 Hz  
 AQ 1.1010048 sec  
 RG 197.27  
 DW 16.800 usec  
 DE 2.79 K  
 TE 300.2 K  
 D1 1.0000000 sec  
 D11 0.0300000 sec  
 TDO 1

==== CHANNEL f1 =====  
 SFO1 125.770637 MHz  
 NU1 13C  
 P1 8.90 usec  
 PLW1 103.0000000 W

==== CHANNEL f2 =====  
 SFO2 500.132003 MHz  
 NU2 1H  
 CDDPRG12 waltz16  
 PCPD2 80.00 usec  
 PLW2 13.0000000 W  
 PLW12 0.34327999 W  
 PLW13 0.21969999 W

F2 - Processing parameters  
 SI 32768  
 SF 125.7577683 MHz  
 K2W EM  
 SFS 0 1.00 Hz  
 GB 0 1.40  
 PC 1.40

SSK-11-AMB-114-COSY

```

NAME          SSK-11-AMB-114-COSY
EXPNO         1
PROCNO        1
Date_         20140612
Time_        22:22:20
INSTRUM       5 mm SEI IH/D-
PROBHD        cosyprdf
PULPROG       zgpg30
TD            32768
SOLVENT       CDCl3
NS            16
DS            16
SWH           1302.083 Hz
FIDRES        0.635783 Hz
AQ            0.7864820 sec
RG            384.000 usec
DE            5.50 usec
TE            29.0 K
D0            0.00000300 sec
D1            1.00000000 sec
D12           0.00020000 sec
D13           0.00020000 sec
D16           0.00076800 sec
IN0           0.00076800 sec

===== CHANNEL f1 =====
NUC1          1H
P1            6.75 usec
PL1          -3.00 dB
PL12         16.73965454 dB
PL16         400.1318685 MHz
SF01         400.1300935 MHz

===== GRADIENT CHANNEL =====
GPRAM1       SINE_100
GPZ1         10.00 %
PLG          1000.00 usec
ND0
TD           82
SF01         400.1316 MHz
FIDRES        15.878823 Hz
SN           3.254 ppm
F2MODE       VE
SI           2048
SF           400.1300935 MHz
SFO1         400.1300935 MHz
SINE
WDW          SINE
SSB          0
LB           0.00 Hz
GB           0
EC           1.40
FC           0
SC2          512
SF           400.1300095 MHz
SFO1         400.1300095 MHz
SINE
SSB          0
LB           0.00 Hz
GB           0
  
```

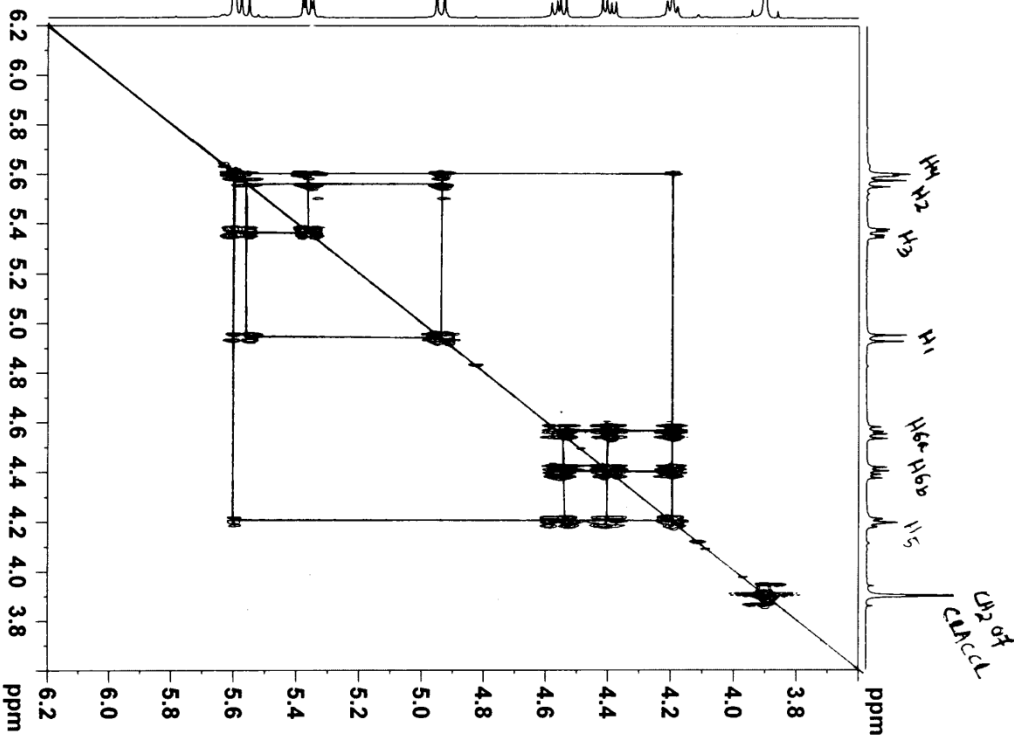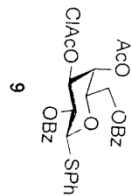

SSK-11-AMB-144-1H

Current Data Parameters  
 NAME SSK-11-AMB-144-1H  
 EXPNO 11  
 PROCNO 1

F2 - Acquisition Parameters

Date\_ 20131110  
 Time 11.43  
 INSTRUM spect  
 PROBD 5 mm PABBO BB/  
 PULPROG zg30  
 TD 65536  
 SOLVENT CMC13  
 NS 1  
 DS 1  
 SMH 10000.000 Hz  
 FIDRES 0.152588 Hz  
 AQ 3.2767999 sec  
 RG 30.72  
 DW 50.000 usec  
 DE 6.50 usec  
 TE 294.5 K  
 D 1.0000000 sec  
 TDO 1

\*\*\*\*\* CHANNEL f1 \*\*\*\*\*  
 SFO1 500.130885 MHz  
 NUC1 1H  
 P1 13.00 usec  
 PLM1 13.00000000 W

F2 - Processing Parameters  
 SI 46536  
 SF 500.1300122 MHz  
 EM  
 SSB 0  
 LB 0 0.30 Hz  
 GB 0  
 PC 1.00

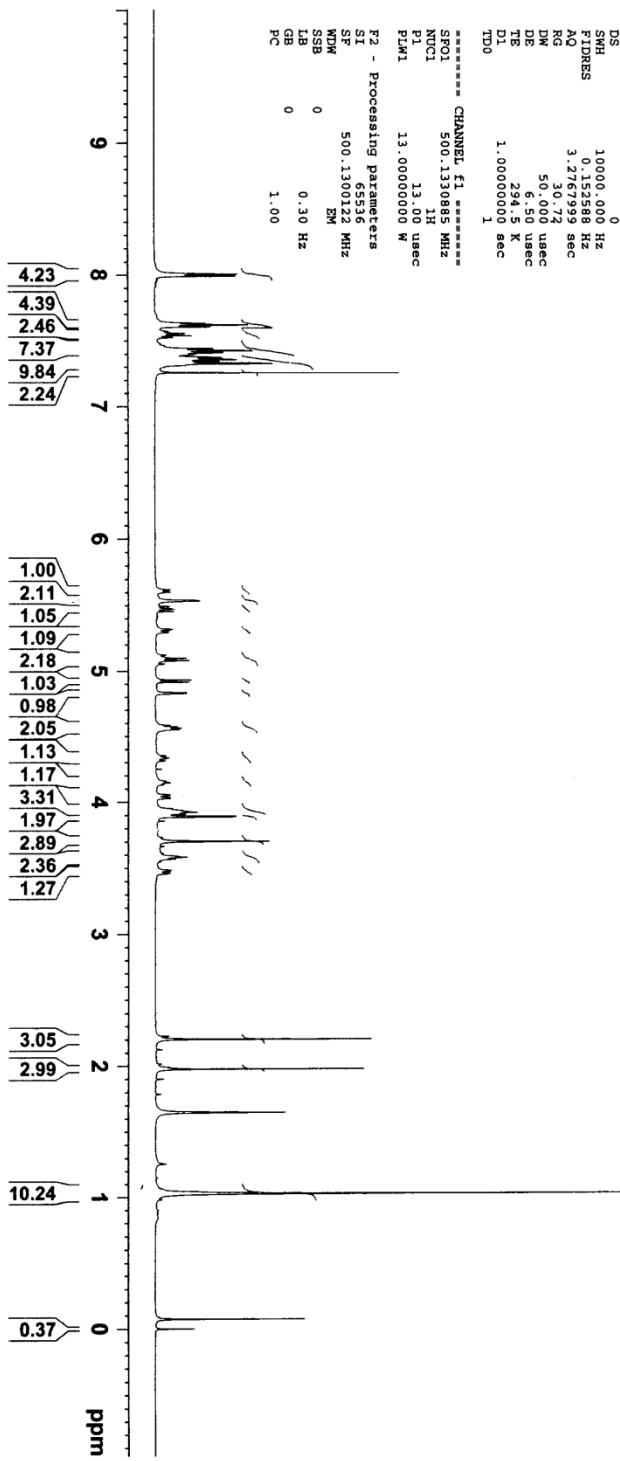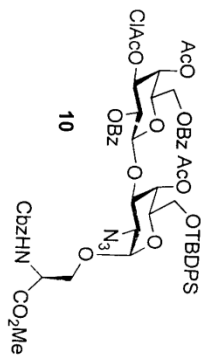

- SSK-11-AMB-224-13C
- 170.67
  - 170.40
  - 169.39
  - 166.82
  - 165.94
  - 165.25
  - 156.12
  - 136.11
  - 135.71
  - 135.70
  - 133.55
  - 133.54
  - 133.21
  - 133.16
  - 129.95
  - 129.87
  - 129.44
  - 129.29
  - 128.75
  - 128.67
  - 128.58
  - 128.50
  - 128.39
  - 127.88
  - 127.83
  - 101.71
  - 98.86
  - 77.45
  - 77.40
  - 77.20
  - 76.95
  - 74.39
  - 72.63
  - 70.89
  - 70.79
  - 69.44
  - 69.31
  - 68.92
  - 67.44
  - 66.86
  - 62.52
  - 61.13
  - 59.55
  - 54.32
  - 52.88
  - 40.50
  - 26.84
  - 20.85
  - 20.72
  - 19.24

Current Data Parameters  
 NAME SSK-11-AMB-224-13C  
 EXPMO 3  
 PROCNO 1

F2 - Acquisition Parameters  
 Date\_ 20140603  
 Time 19:06  
 INSTRUM 5 mm PABBO BBO  
 PULPROG zgpg30  
 TD 28516  
 SOLVENT CDCl3  
 NS 239  
 DS 4  
 SMH 29761.904 Hz  
 FIDRES 0.454131 Hz  
 AQ 1.1010048 sec  
 RG 197.27  
 DM 16.800 usec  
 DE 8.50 usec  
 TE 29.59 usec  
 D1 1.0000000 sec  
 D11 0.03000000 sec  
 TD0 1

==== CHANNEL F1 =====  
 SFO1 125.7703637 MHz  
 NUCL1 13C  
 P1 8.90 usec  
 FLM1 103.00000000 W

==== CHANNEL F2 =====  
 SFO2 500.1320065 MHz  
 NUCL2 1H  
 CPDPRG2 waltz16  
 BCPD2 13.00000000 W  
 PLM12 0.34327999 W  
 PLM13 0.21969999 W

F2 - Processing parameters  
 SI 32768  
 SF 125.7577337 MHz  
 MDW 0 EM  
 SSB 0 1.00 Hz  
 GB 0  
 EC 1.40

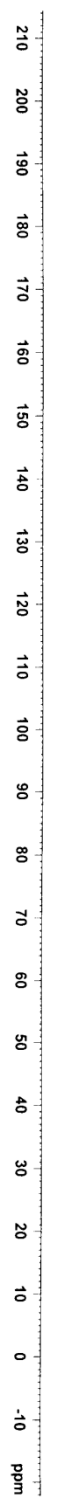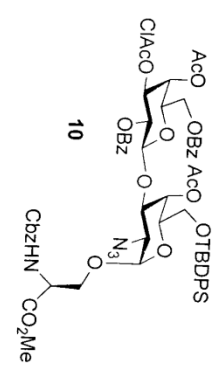



SSK-11-AMB-227-1h

Current Data Parameters  
NAME SSK-11-AMB-227-1h  
EXPNO 9  
PROCNO 1

F2 - Acquisition Parameters

Date\_ 20140613  
Time 23.57  
INSTRUM spect  
PROBHD 5 mm BBO BB  
PULPROG zg30  
TD 65536  
SOLVENT CDCl3  
NS 41  
DS 2  
SWH 10000.000 Hz  
FIDRES 0.152588 Hz  
AQ 3.276797 sec  
RG 972  
DE 50.000 usec  
TE 297.8 K  
D1 1.0000000 sec  
TD0 1

==== CHANNEL f1 =====  
SFO1 500.130892 MHz  
NUC1 13C  
P1 13.00 usec  
PL1 13.00000000 W

F2 - Processing parameters  
SI 65536  
SF 500.130000 MHz  
WDW EM  
SSB 0  
LB 0.30 Hz  
GB 0  
PC 1.00

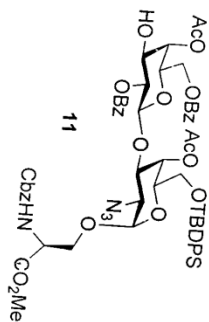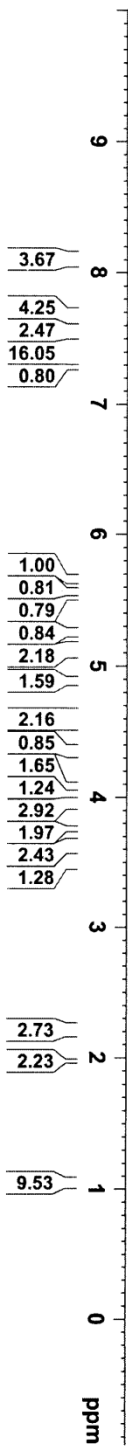

SSK-11-AMB-177-13C

171.08  
170.50  
170.37  
169.26  
166.52  
166.18  
165.95  
165.23  
156.05  
135.99  
135.61  
135.57  
133.32  
133.22  
133.07  
132.96  
129.83  
129.74  
129.59  
129.45  
128.60  
128.49  
128.37  
128.30  
128.25  
128.00  
127.77  
127.74  
127.71  
101.58  
98.78  
77.46  
77.40  
77.20  
76.95  
74.50  
73.06  
72.95  
72.48  
71.11  
70.99  
70.86  
69.98  
69.52  
68.78  
67.30  
67.08  
62.54  
61.71  
59.36  
54.21  
52.77

26.73  
20.81  
20.61  
19.13  
19.08

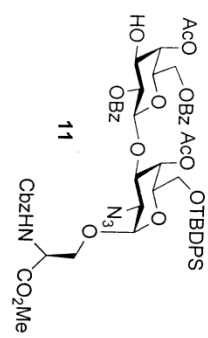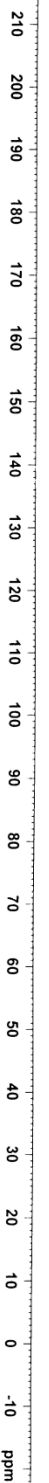

Current Data Parameters  
 NAME SSK-11-AMB-177-13C  
 EXPNO 13  
 PROCNO 1

F2 - Acquisition Parameters  
 Date\_ 20140126  
 Time 11:25  
 INSTRUM spect  
 PROBHD 5 mm PABBO BB/  
 PULPROG zgpg30  
 TD 65536  
 SOLVENT CDCl3  
 NS 91  
 DS 4  
 SMH 29761.904 Hz  
 FIDRES 0.454131 Hz  
 AQ 1.1010048 sec  
 RG 197.27  
 DQ 16.890 usec  
 DE 1.480 usec  
 TE 293.7 K  
 D1 1.00000000 sec  
 D11 0.03000000 sec  
 TDO 1

==== CHANNEL #1 =====  
 SFO1 125.7703637 MHz  
 NUQ1 13C  
 P1 8.99 usec  
 P1A1 103.00000000 W

==== CHANNEL #2 =====  
 SFO2 500.1320005 MHz  
 NUQ2 1H  
 CPDPRD12 waltz16  
 PCPD2 80.00 usec  
 PLM12 13.00000000 W  
 PLM13 0.34327999 W  
 PLM13 0.21969999 W

F2 - Processing parameters  
 SI 32768  
 SF 125.7577928 MHz  
 VM EM  
 SSB 0  
 LB 1.00 Hz  
 GB 0  
 PC 1.40

SSK-11-AMB-227-cosy

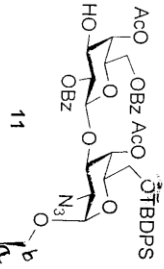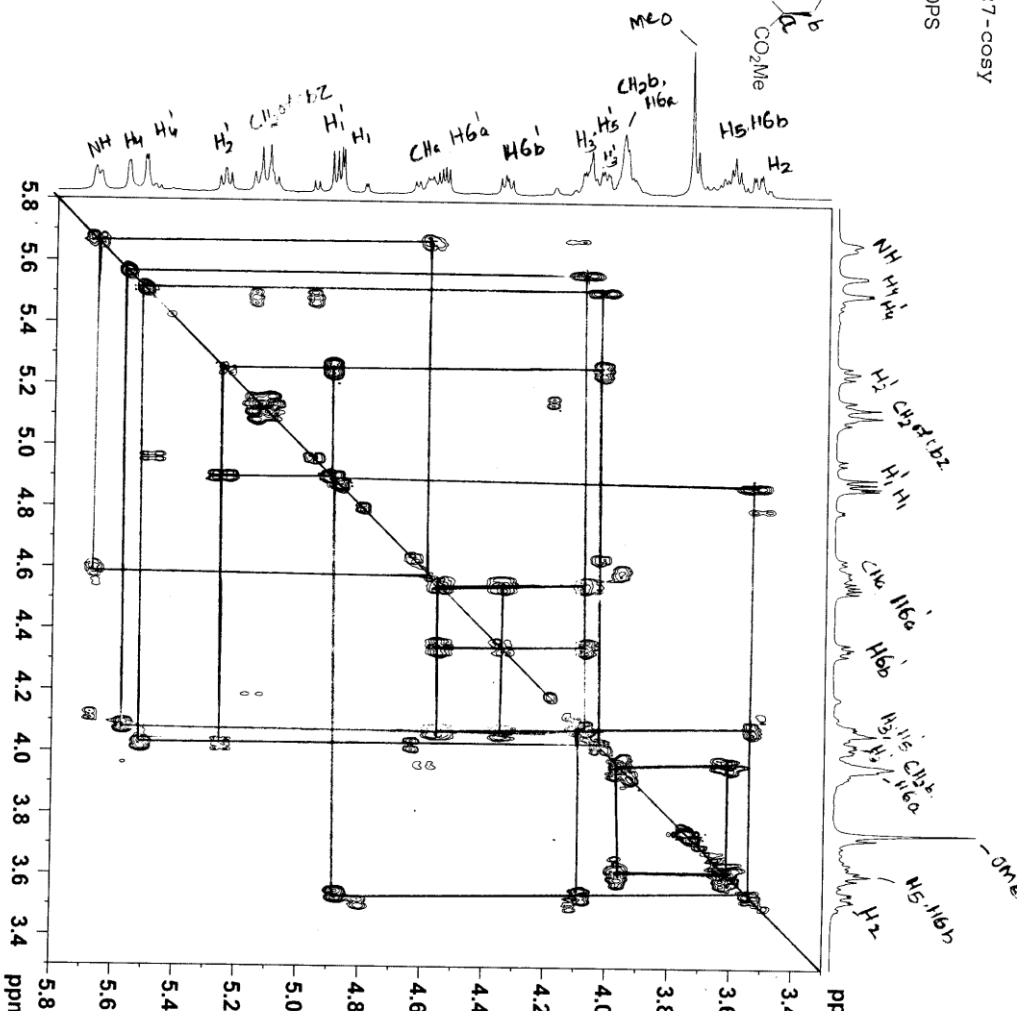

Current Data Parameters  
 Name: SSK-11-AMB-227-cosy  
 EXPNO: 1  
 PROCNO: 1

F2 - Acquisition Parameters  
 Date\_ Time: 20120523 13:53  
 INSTRUM: spect  
 PROBHD: 5 mm PABBO BB/  
 PULPROG: cosypppqr  
 T1: 1.00  
 SOLVENT: CDCl3  
 NS: 4  
 DS: 8  
 SWH: 1490.757 Hz  
 FIDRES: 0.1453446 Hz  
 AQ: 0.343446 sec  
 RG: 61.42  
 DW: 335.400 usec  
 DE: 6.50 usec  
 TE: 300.2 K  
 D0: 0.0000100 sec  
 D1: 1.000000000 sec  
 D11: 0.030000000 sec  
 D12: 0.0002000 sec  
 D13: 0.0000000 sec  
 D16: 0.0002000 sec  
 INO: 0.00067080 sec

===== CHANNEL f1 =====  
 SFO1: 500.132400 MHz  
 NUC1: 1H  
 P0: 13.00 usec  
 P1: 13.00 usec  
 PL1: 2500.00 usec  
 PL10: 13.0000000 usec  
 PL11: 3.250000000 M

===== GRADIENT CHANNEL =====  
 GPCP: SMC010.100  
 GP2P: SMC010.100  
 P16: 1000.00 usec

F1 - Acquisition parameters  
 SFO1: 500.132400 MHz  
 FIDRES: 15.21809 Hz  
 SW: 2.981 ppm  
 RMWDEL: QF

F2 - Processing parameters  
 SI: 1024  
 SF: 500.1300000 MHz  
 WDM: 0 Hz  
 SSB: 0 Hz  
 GB: 0  
 PC: 1.40

F1 - Processing parameters  
 SI: 1024  
 SF: 500.1300000 MHz  
 WDM: 0 Hz  
 SSB: 0 Hz  
 GB: 0  
 PC: 1.40



SSK-11-AMB-226-1H

SSK-11-AMB-226-1H

NAME SSK-11-AMB-226-1H  
 EXRNO 1  
 PROCNO 1  
 Date\_ 20140614  
 Time 14.35  
 INSTRUM 5 mm SEI 1H/D-  
 PROBD spect  
 PULPROG zg30  
 TD 2930  
 F2 65536  
 SOLVENT CDCl3  
 NS 32  
 DS 0  
 SWH 8223.685 Hz  
 FIDRES 0.125483 Hz  
 AQ 3.9846387 sec  
 RG 28.5  
 DW 60.800 usec  
 DE 6.50 usec  
 TE 295.9 K  
 D1 1.00000000 sec  
 TD0 1

===== CHANNEL f1 =====  
 NUCL 1H  
 P1 6.75 usec  
 PL1 -3.00 dB  
 PL1W 16.73965454 W  
 SF01 400.1324710 MHz  
 SI 32768  
 SF 400.1300213 MHz  
 WDW EM  
 SSB 0  
 LB 0.30 Hz  
 GB 0  
 PC 1.00

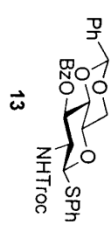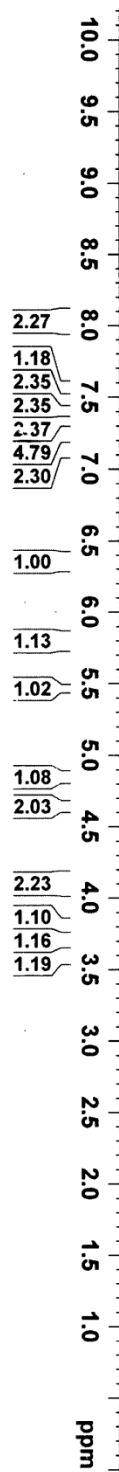

SSK-11-AMB-226-13C

167.03  
154.60  
136.92  
133.70  
132.69  
132.57  
130.13  
129.01  
128.95  
128.55  
128.14  
128.11  
125.87  
100.96  
95.45  
88.35  
87.73  
77.37  
77.12  
76.86  
74.42  
73.80  
70.49  
68.30  
55.52

Current Data Parameters  
NAME SSK-11-AMB-226-13C  
EXENO 1  
PROCNO 1

F2 - Acquisition Parameters  
Date\_ 20140617  
Time 11:24  
INSTRUM spect  
PROBHD 5 mm PABBO BB/  
PULPROG zgpg30  
TD 65536  
SOLVENT CDCl3  
NS 396  
DS 4  
SWH 29761.904 Hz  
FIDRES 0.454131 Hz  
AQ 1.1010048 sec  
RG 197.27  
DM 16.880 usec  
DE 4.480 usec  
TE 297.2 K  
D1 1.00000000 sec  
D11 0.03000000 sec  
TDO 1

==== CHANNEL f1 =====  
SFO1 125.7703637 MHz  
NUC1 13C  
P1 8.90 usec  
PL1 103.00000000 W  
PLM1

==== CHANNEL f2 =====  
SFO2 500.1320005 MHz  
NUC2 1H  
PCPD12 waltz16  
PCPD2 80.00 usec  
PLM2 13.00000000 W  
PLM12 0.34327999 W  
PLM13 0.21969999 W

F2 - Processing parameters  
SI 32768  
SF 125.7577890 MHz  
WDW EM  
SSB 0  
LB 1.00 Hz  
GB 0  
PC 1.40

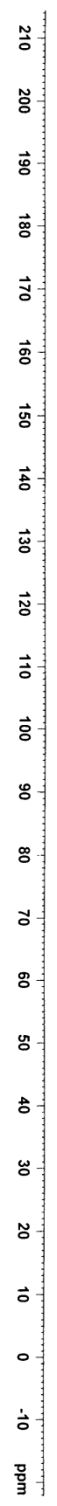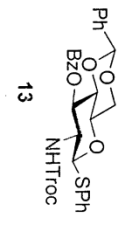

SSK-11-AMB-226-COSY

```

NAME          SSK-11-AMB-226-COSY
EXPNO         1
PROCNO        1
Date_         20140614
Time          14.59
INSTRUM       spect
PROBHD        5 mm SEI 1H/D-
PULPROG       cosygpgf
TD            2048
SOLVENT       CDCl3
NS            16
DS            16
SMH           1393.534 Hz
FIDRES        0.680437 Hz
AQ            0.7348724 sec
RG            22.6
DM            358.800 usec
DE            6.50 usec
TE            296.0 K
D0            0.00000300 sec
D1            1.00000000 sec
D13           0.00000400 sec
D16           0.00020000 sec
IN0           0.00071815 sec

===== CHANNEL f1 =====
NUC1          1H
P0            13.50 usec
P1            13.50 usec
PL1           -1.00 dB
PL1W          10.56200695 W
SFO1          400.1320005 MHz

===== GRADIENT CHANNEL =====
GPNAM1        SINE.100
GPZ1          10.00 %
P16           1000.00 usec
ND0           1
TD            232
SFO1          400.132 MHz
FIDRES        6.001980 Hz
SW            3.480 ppm
FnmODE        QF
SI            2048
SF            400.1300213 MHz
WDW           SINE
SSB           0
LB            0.00 Hz
GB            0
  
```

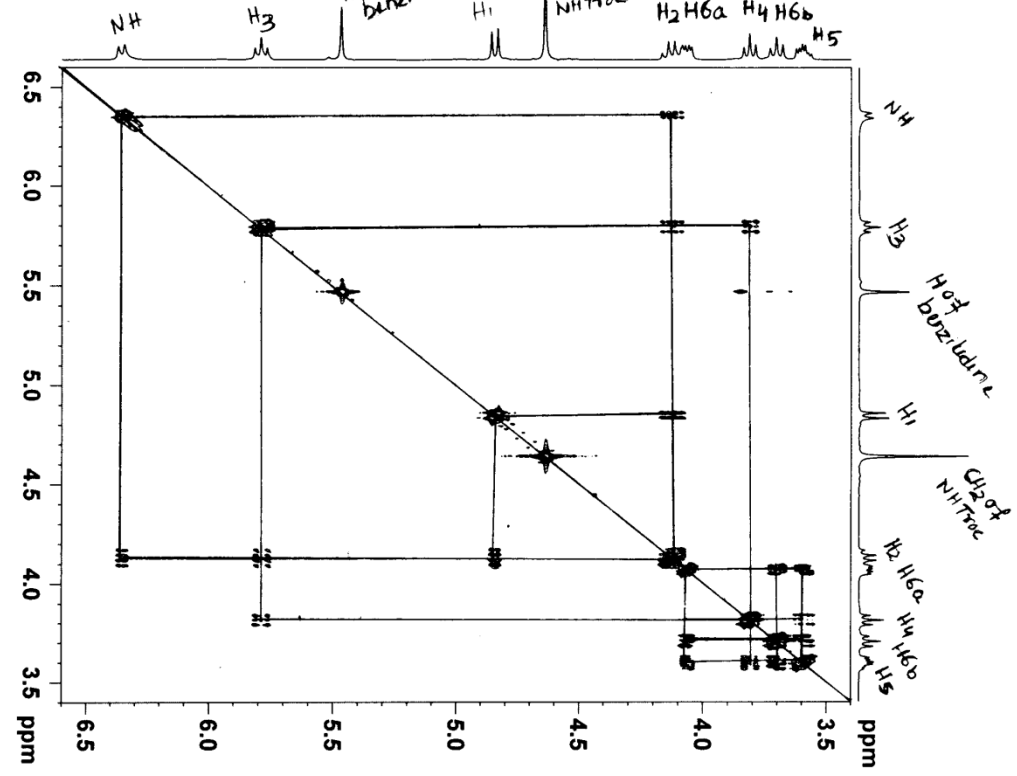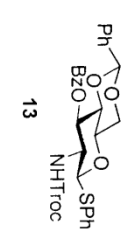

SSK-11-AMB-222B-1H

Current Data Parameters  
 NAME SSK-11-AMB-222B-1H  
 EXPNO 8  
 PROCNO 1

F2 - Acquisition Parameters

Date\_ 20140620  
 Time 23.41  
 INSTRUM 5 mm PABBO-BB  
 PULPROG zgpg30  
 FIDPROC 65536  
 TD 65536  
 SOLVENT CDCl3  
 NS 7  
 DS 2

SMH 10000.000 Hz  
 FIDRES 0.152588 Hz  
 AQ 3.2767999 sec  
 RG 30.72  
 DR 50.000 usec  
 DE 6.50 usec  
 TE 297.7 K  
 D1 1.00000000 sec  
 TD0 1

\*\*\*\*\* CHANNEL F1 \*\*\*\*\*  
 SFO1 500.1330885 MHz  
 P1 13.00 usec  
 P2 13.00 usec  
 PLM1 13.00000000 W

F2 - Processing parameters  
 SI 65536  
 SF 500.1300262 MHz  
 WDM 0 EM  
 SSB 0  
 GB 0 0.30 Hz  
 RB 0  
 PC 1.00

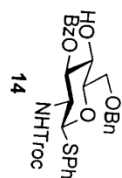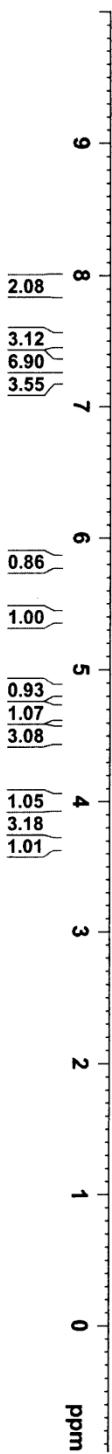

NAME SSK-11-AMB-222-13C  
 EXPNO 9  
 PROCNO 1  
 Date\_ 20140612  
 Time\_ 21.23  
 INSTRUM spect  
 PROBHD 5 mm SEI 1H/D-  
 PULPROG zgpg30  
 TD 65336  
 SOLVENT CDCl3  
 NS 549  
 DS 4  
 SWH 24038.461 Hz  
 FIDRES 0.366798 Hz  
 AQ 1.3631988 sec  
 RG 181  
 DW 20.800 usec  
 DE 6.50 usec  
 TE 296.1 K  
 D1 1.00000000 sec  
 D11 0.03000000 sec  
 TD0 1

==== CHANNEL f1 =====  
 NUCl 13C  
 P1 8.75 usec  
 P11 -2.00 dB  
 P11W 56.53121948 W  
 SFO1 100.628298 MHz

==== CHANNEL f2 =====  
 CPDPRG2 waltz16  
 NUCC2 1H  
 PCPD2 80.00 usec  
 PL2 -1.00 dB  
 PL12 14.50 dB  
 PL13 14.50 dB  
 PL2W 10.56200695 W  
 PL12W 0.29767781 W  
 PL13W 0.29767781 W  
 SFO2 400.1316005 MHz  
 SI 32768  
 SF 100.6127686 MHz  
 WDW EM  
 SSB 0  
 LB 1.00 Hz  
 GB 0  
 PC 1.40

- 167.42
- 154.48
- 137.89
- 133.77
- 133.56
- 133.16
- 132.15
- 131.93
- 130.11
- 129.17
- 129.03
- 128.86
- 128.67
- 128.35
- 127.94
- 127.63
- 95.46
- 86.94
- 78.61
- 77.52
- 77.20
- 76.88
- 74.33
- 73.67
- 70.46
- 69.90
- 55.07
- 54.70

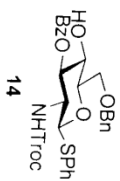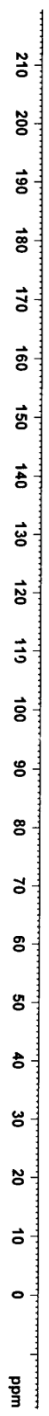

SSK-11-AMB-222-COSY

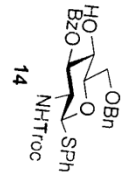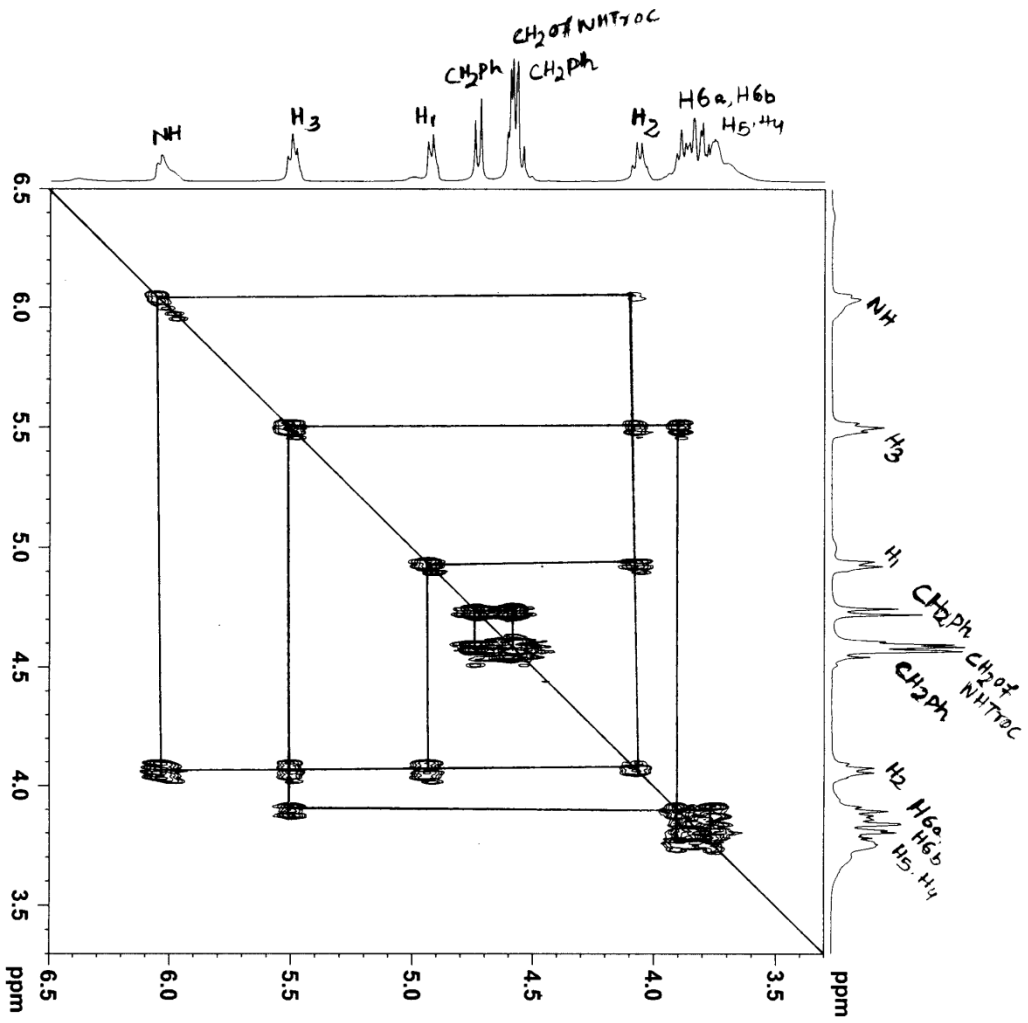

SSK-11-AMB-156-1H

Current Data Parameters  
 NAME SSK-11-AMB-156-1H  
 EXPNO 5  
 PROCNO 1

F2 - Acquisition Parameters

Date\_ 2013.09  
 Time\_ 13.49  
 INSTRUM spect  
 PROBRD 5 mm PABBO BB/  
 PULPROG zg30  
 TD 65536  
 SOLVENT CMC13  
 NS 19  
 DS 2  
 SFO1 10000.000 Hz  
 FIDRES 0.145418 Hz  
 AQ 3.276799 sec  
 RG 15.73  
 DW 50.000 usec  
 DE 6.50 usec  
 TE 295.2 K  
 D1 1.00000000 sec  
 TDO 1

==== CHANNEL f1 =====

SFO1 500.1330885 MHz  
 NUC1 1H  
 P1 13.00 usec  
 PL1 13.00000000 W

F2 - Processing parameters

SF 65536  
 KW 500.1300000 MHz  
 SSB 0  
 LB 0  
 GB 0  
 PC 1.00

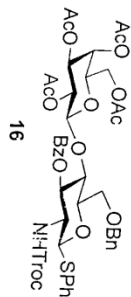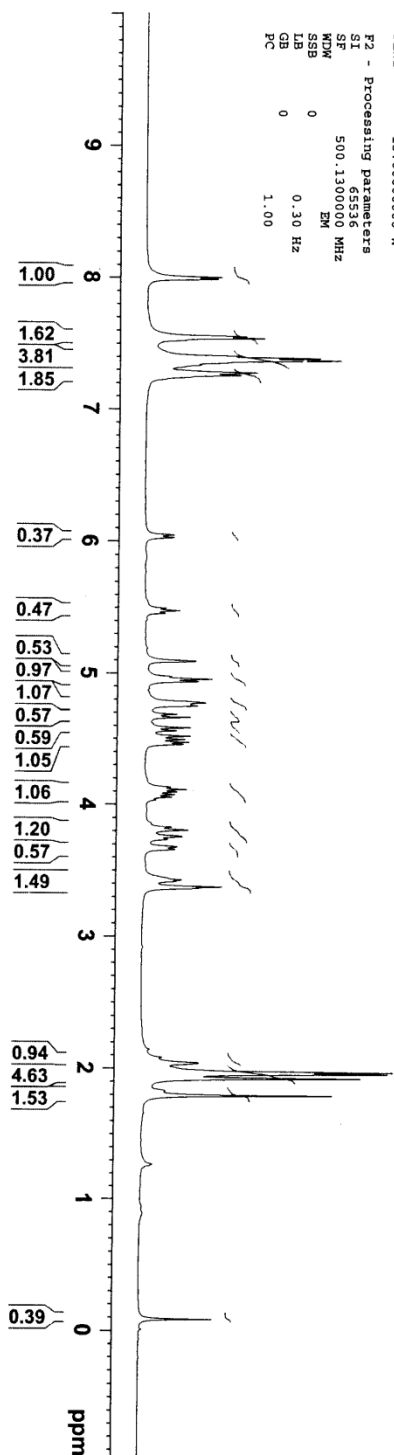

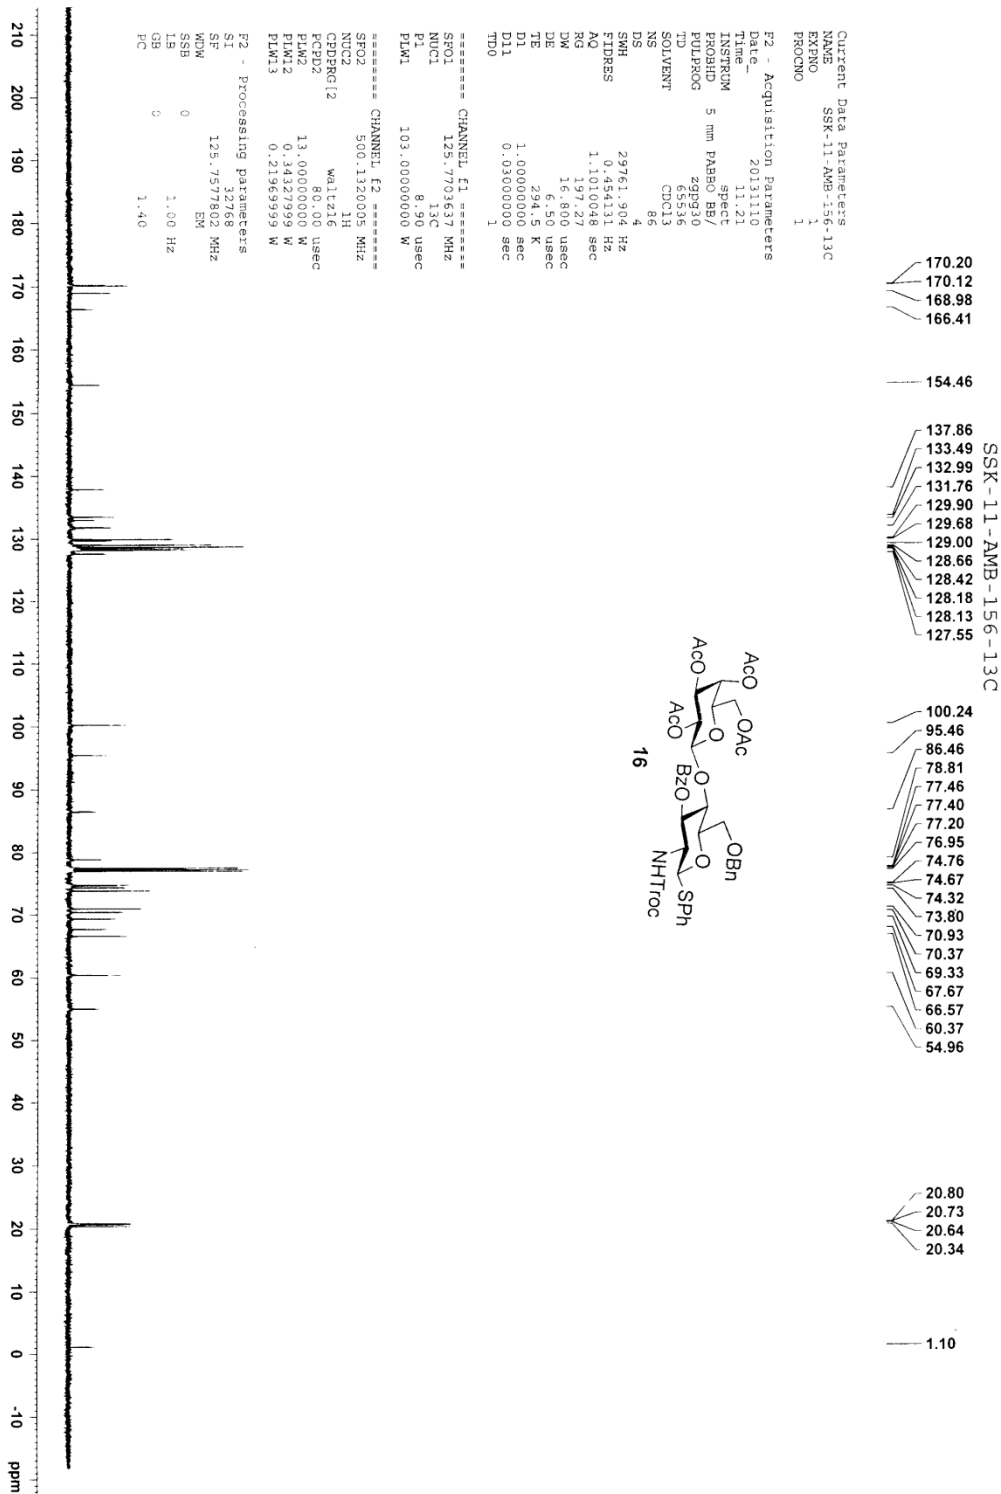



SSK-11-AMB-156-COSY

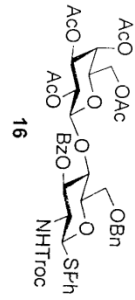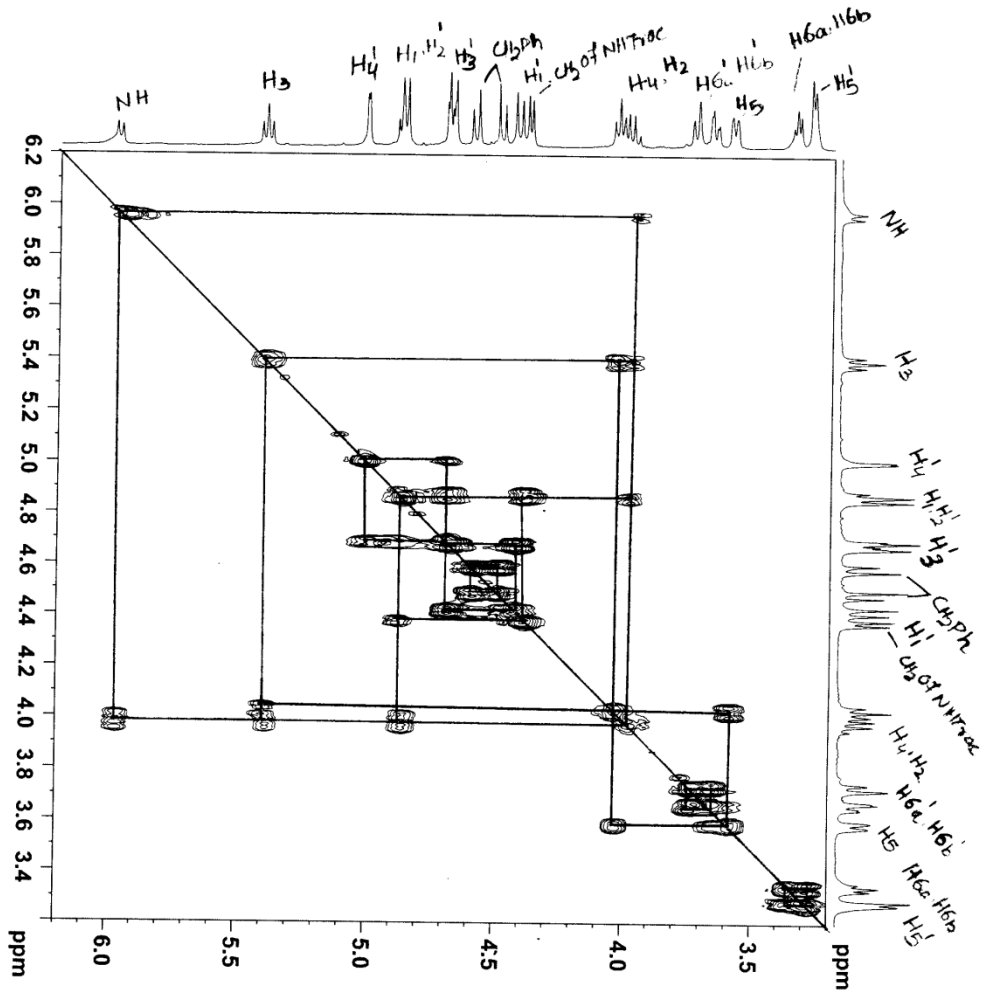

ssk-11-amb-158-1h

Current Data Parameters  
 NAME ssk-11-amb-158-1h  
 EXPNO 1  
 PROCNO 1

F2 - Acquisition Parameters  
 Date\_ 2013114  
 Time 22.42  
 INSTRUM spect  
 PROBD 5 mm PABBO BB/  
 PULPROG zg30  
 TD 65536  
 SOLVENT CDCl3  
 NS 3  
 DS 2  
 SWH 10000.000 Hz  
 FIDRES 0.152588 Hz  
 AQ 3.2767999 sec  
 RG 53.37  
 DW 50.000 usec  
 DE 6.50 usec  
 TE 295.6 K  
 TD 1.0000000 sec  
 TDO 1

===== CHANNEL f1 =====  
 SF01 500.130885 MHz  
 NUC1 1H  
 P1 13.00 usec  
 PLM1 13.00000000 W

F2 - Processing parameters  
 SI 4096  
 SF 500.130000 MHz  
 MDW 0 EM  
 SSB 0  
 LB 0 0.30 Hz  
 GB 0  
 PC 1.00

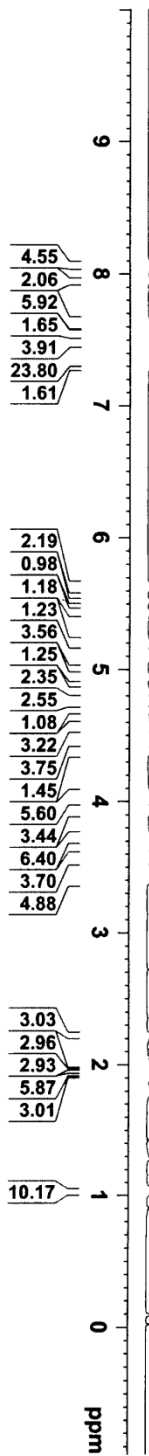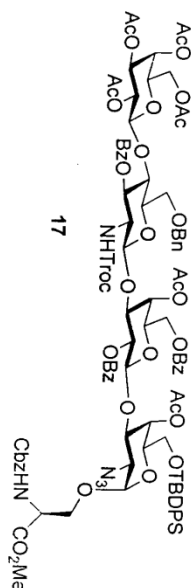

- 170.44  
170.37  
170.24  
170.20  
170.18  
169.40  
169.18  
166.19  
165.91  
164.90  
156.13  
154.04  
138.15  
136.16  
135.75  
135.70  
133.59  
133.53  
133.36  
133.24  
129.93  
129.84  
129.77  
129.57  
128.74  
128.69  
128.55  
128.47  
128.40  
128.05  
127.88  
127.81  
102.24  
101.80  
100.36  
98.94  
95.48  
77.45  
77.20  
76.95  
74.09  
74.03  
73.96  
72.61  
71.49  
71.26  
71.00  
70.55  
69.66  
69.37  
69.16  
68.87  
67.65  
67.42  
66.62  
62.74  
62.35  
60.51  
59.55  
56.39  
54.34  
52.88  
26.86  
21.03  
20.83  
20.80  
20.73  
20.67  
20.57  
19.26

skk-11-amb-158-13c

Current Data Parameters  
 NAME skk-11-amb-11  
 EXPNO 1  
 PROCNO 1  
 F2 - Acquisition Parameters  
 Date\_ 20131111  
 Time 22.4  
 PROBHD 5 mm F401P1  
 PULPROG zgpg30  
 TD 6553  
 SOLVENT CDCl3  
 NS 92  
 DS 2  
 SWH 29761.904 Hz  
 FIDRES 0.454131 Hz  
 AQ 1.1010048 sec  
 RG 197.27  
 DW 16.800 usec  
 DE 2.50 usec  
 TE 300.2 K  
 D1 1.0000000 sec  
 D11 0.0300000 sec  
 TDO 1

==== CHANNEL f1 =====  
 SF01 125.7703637 MHz  
 NUC1 13C  
 P1 8.90 usec  
 PLW1 103.00000000 W

==== CHANNEL f2 =====  
 SF02 500.1320005 MHz  
 NUC2 1H  
 CPDPRG2 waltz16  
 PCPD2 13.00000000 W  
 PLM2 0.34327999 W  
 PLM3 0.21969999 W

F2 - Processing parameters  
 SI 32768  
 SF 125.7577706 MHz  
 WDW 0  
 SSB 0  
 GB 0  
 PC 1.40

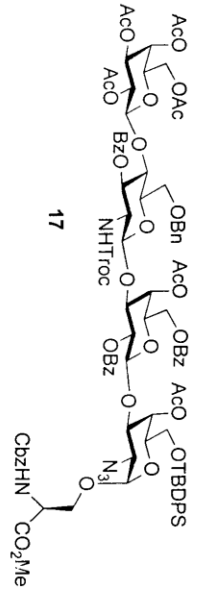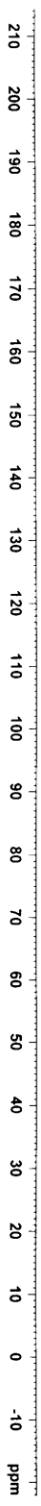

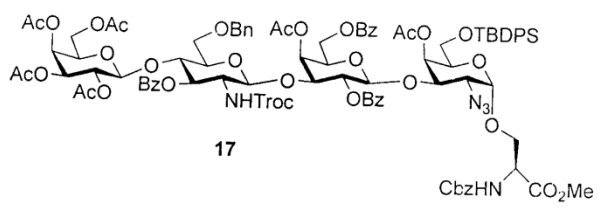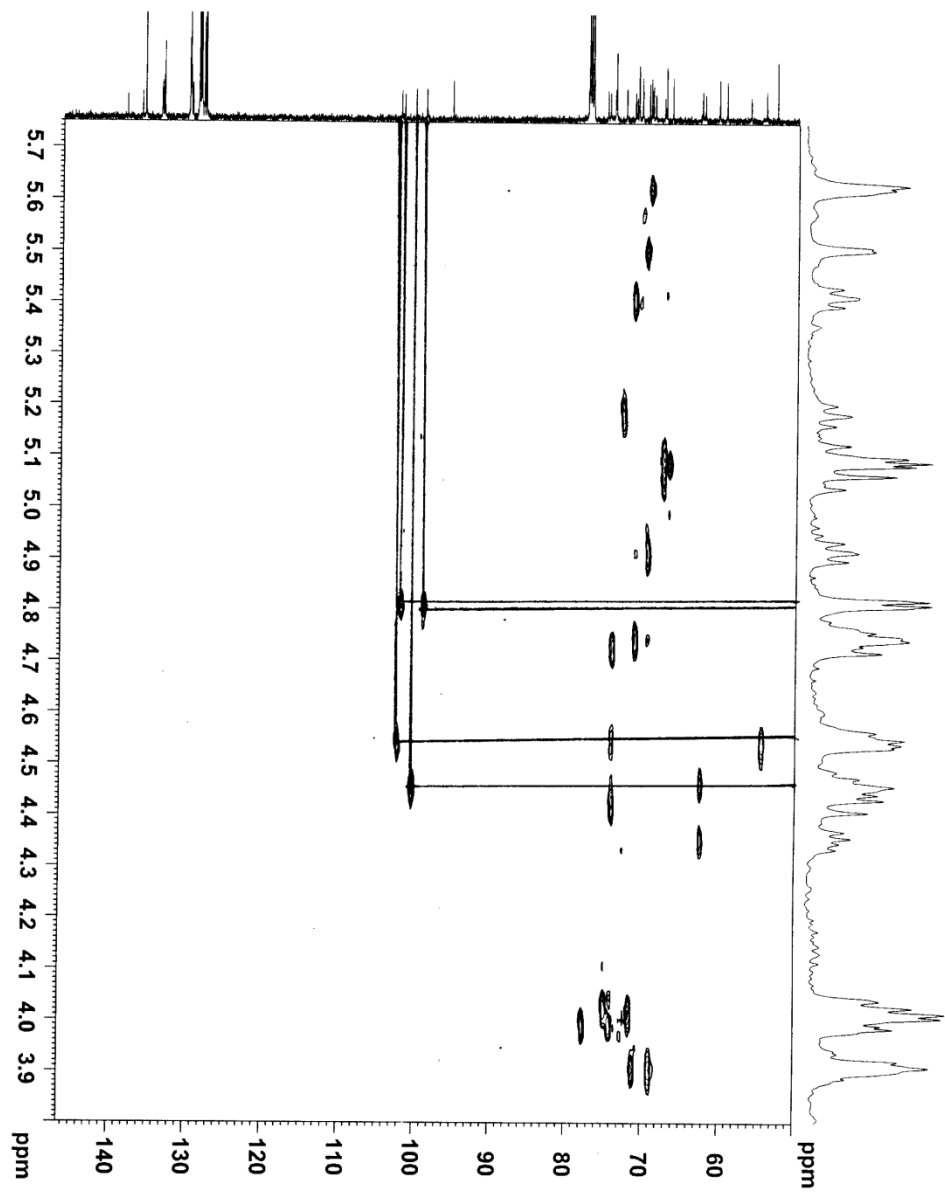

SSK-11-AMB-181-1H

Current Data Parameters  
 EXPNO 1  
 PROCNO 1

F2 - Acquisition Parameters  
 Date\_ 20140202  
 Time 10.39

INSTRUM spect  
 PROBRD 5 mm PABBO B9/  
 PULPROG zgpg30  
 TD 65536  
 SOLVENT CDCl3  
 NS 40  
 DS 2

SWH 10000.000 Hz  
 FIDRES 0.152588 Hz  
 AQ 3.2767999 sec  
 RG 30.72  
 DM 50.000 usec  
 DE 1.000 usec  
 TE 295.9 K  
 D1 1.00000000 sec  
 TDO 1

==== CHANNEL f1 =====  
 SFO1 500.130885 MHz  
 NUC1 1H  
 P1 13.00 usec  
 PL1 13.00000000 W

F2 - Processing parameters  
 SI 65536  
 SF 500.130030 MHz  
 MDM EM  
 SSB 0  
 LB 0 0.30 Hz  
 GB 1.00

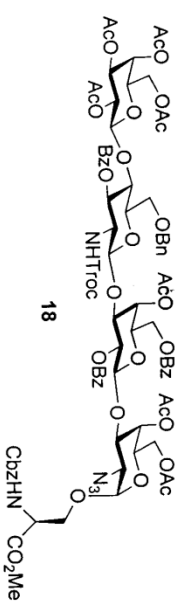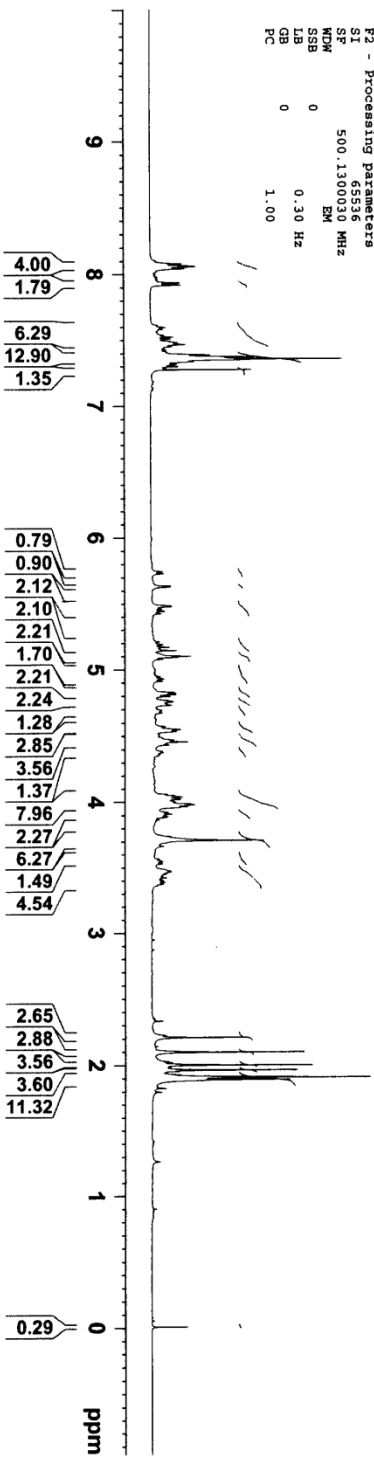

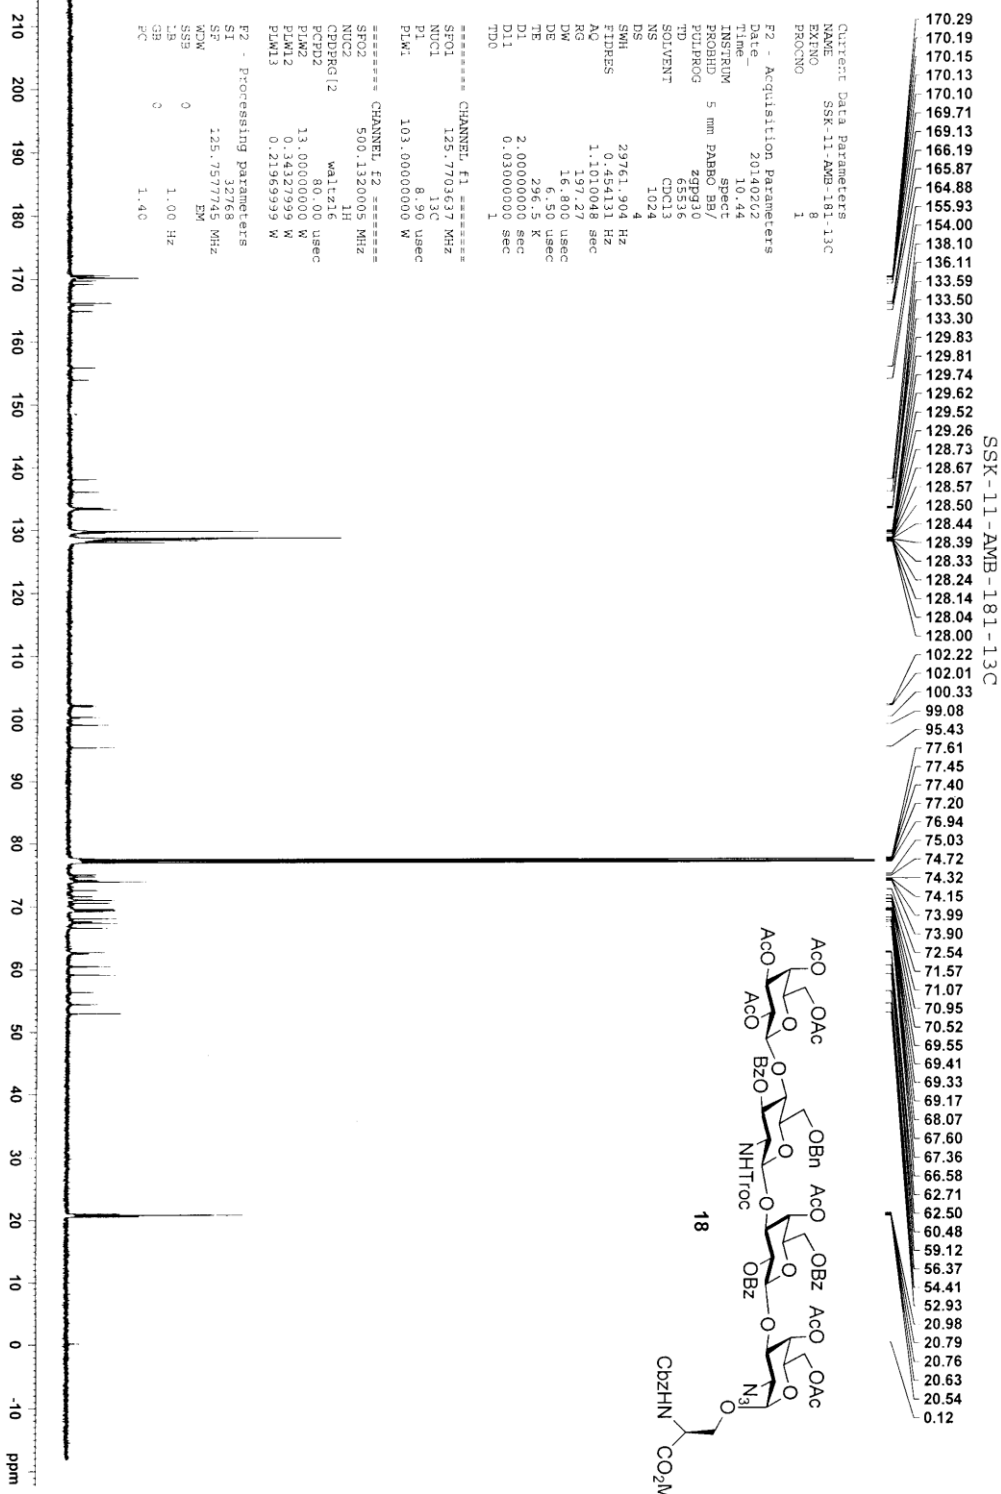

SSK-11-AMB-185-1H

SSK-11-AMB-185-1H

NAME SSK-11-AMB-185-1H  
EXPNO 1  
PROCNO 1  
Date\_ 20140212  
Time\_ 22.06  
INSTRUM spect  
PROBHD 5 mm SEI 1H/D-  
PULPROG zgpg30  
TD 65536  
SOLVENT CDCl3  
NS 68  
DS 0  
SWH 8223.685 Hz  
FIDRES 0.125483 Hz  
AQ 3.9846387 sec  
RG 71.8  
DW 60.800 usec  
DE 6.50 usec  
TE 295.8 K  
D1 1.0000000 sec  
TD0 1

===== CHANNEL F1 =====  
NUC1 1H  
P1 6.75 usec  
PL1 -3.00 dB  
PL1W 16.73965454 W  
SFO1 400.1320007 MHz  
SI 32768  
SE 400.1300101 MHz  
WDW EM  
SSB 0  
LB 0.30 Hz  
GB 0  
PC 1.00

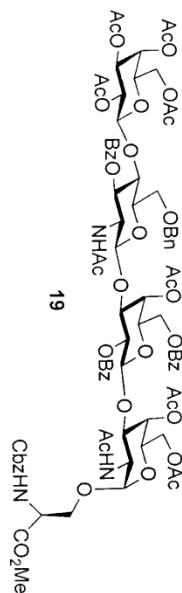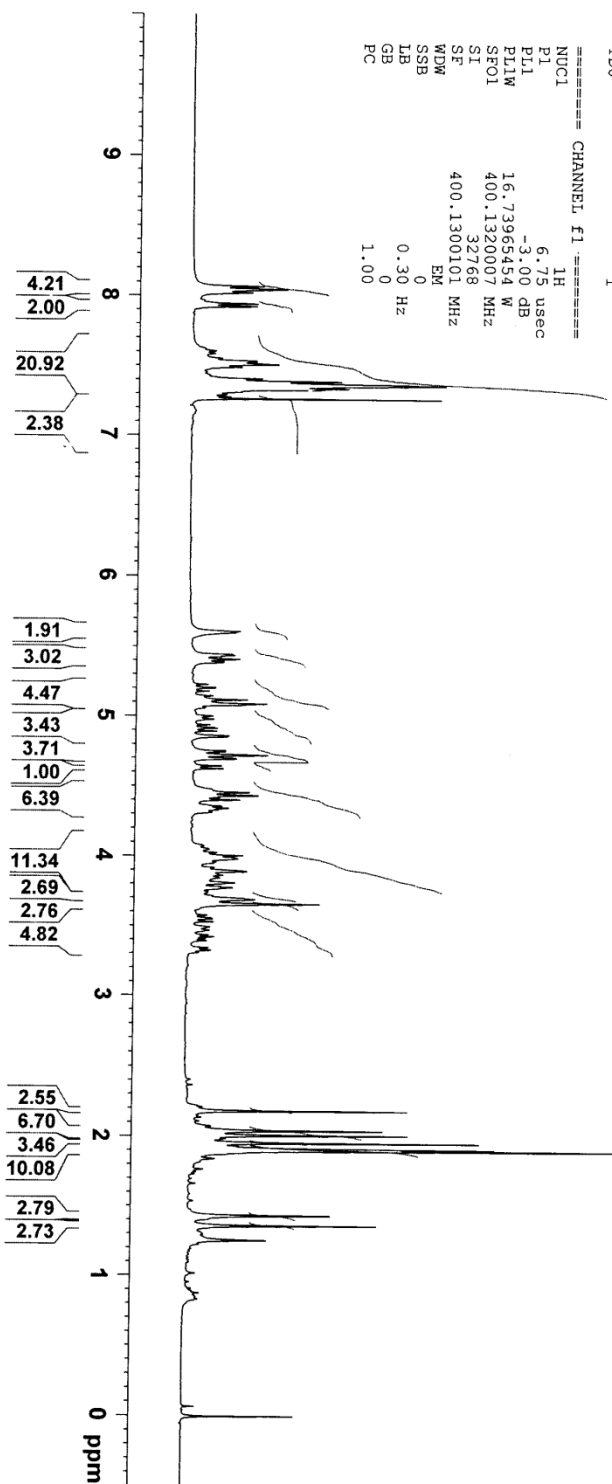

- 170.64
- 170.56
- 170.32
- 170.26
- 170.20
- 170.16
- 170.09
- 169.27
- 166.35
- 166.14
- 164.86
- 155.92
- 138.18
- 136.07
- 134.14
- 133.54
- 133.38
- 129.89
- 129.84
- 129.64
- 129.41
- 129.21
- 128.80
- 128.67
- 128.63
- 128.60
- 128.54
- 128.50
- 128.12
- 128.03
- 128.00
- 102.02
- 100.84
- 100.38
- 98.57
- 77.45
- 77.20
- 76.94
- 71.83
- 70.97
- 70.54
- 69.39
- 69.28
- 69.21
- 68.40
- 67.92
- 67.79
- 67.49
- 66.60
- 63.03
- 62.62
- 60.43
- 54.64
- 54.47
- 52.77
- 49.04
- 22.75
- 22.57
- 20.96
- 20.84
- 20.78
- 20.65
- 20.59

SSK-11-AMB-185-13C

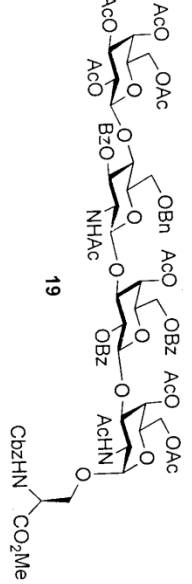

Current Data Parameters  
 NAME SSK-11-AMB-185-13C  
 EXPNO 1  
 PROCNO 1  
 F2 - Acquisition Param  
 Date\_ 20140717  
 Time\_ 18:40:00  
 INSTRUM spect  
 PROBRH 5 mm PABRO BB  
 PULPROG zgpg31  
 TD 65531  
 SOLVENT CDCl3  
 NS 296  
 DS 4  
 SMH 34722.223 Hz  
 FIDRES 0.5229819 Hz  
 AQ 0.9437184 sec  
 DQ 1.471700 usec  
 DE 6.150 usec  
 TE 296.2 K  
 D1 1.00000000 sec  
 D11 0.03000000 sec  
 TDO 1

==== CHANNEL f1 =====  
 SFO1 125.7721254 MHz  
 NUQ1 13C  
 P1 8.30 usec  
 P1M1 103.00000000 W

==== CHANNEL f2 =====  
 SFO2 500.1320005 MHz  
 NUQ2 1H  
 CDDPR12 Waltz16  
 PCPDP2 13.00000000 W  
 PLW12 0.34327999 W  
 PLW13 0.21969999 W

F2 - Processing parameters  
 SI 32768  
 SF 125.7577658 MHz  
 WDW EM  
 SSB 0  
 LB 1.00 Hz  
 GB 0  
 PC 1.40

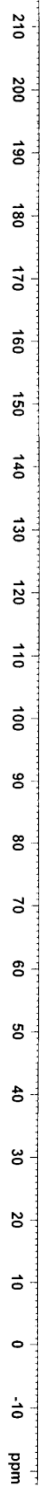



SSK-11-AMB-187-1H

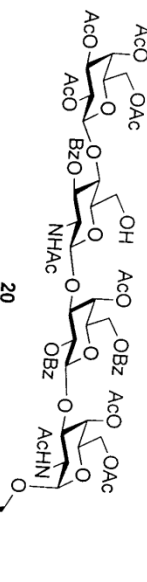

Current Data Parameters  
 NAME SSK-11-AMB-187-1H  
 EXPNO 12  
 PROCNO 1

F2 - Acquisition Parameters  
 Date\_ 20140214  
 Time 23.05  
 INSTRUM spect  
 PROBRD 5 mm PABBO BB/  
 PULPROG zg30  
 TD 65536  
 SOLVENT CDCl3  
 NS 2  
 DS 15  
 SWH 10000.002 Hz  
 FIDRRS 0.152588 Hz  
 AQ 3.276799 sec  
 RG 106.54  
 DW 50.000 usec  
 DE 6.50 usec  
 TE 297.0 K  
 D1 1.00000000 sec  
 D10 1

===== CHANNEL f1 =====  
 SFO1 500.1330885 MHz  
 NUC1 1H  
 P1 13.00 usec  
 PLM1 13.00000000 W

F2 - Processing parameters  
 SI 32768  
 SF 500.130000 MHz  
 MDW 500.130000 MHz  
 SSB 0  
 LB 0 0.30 Hz  
 GB 0  
 PC 1.00

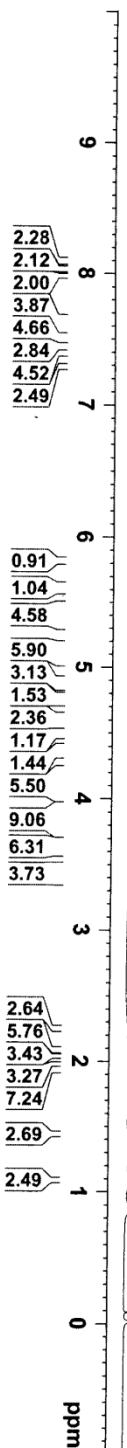

SKK-11-amb-170-13C

- 171.14
- 170.65
- 170.39
- 170.26
- 170.17
- 170.07
- 169.69
- 166.22
- 165.96
- 164.84
- 165.95
- 134.02
- 133.71
- 133.60
- 133.50
- 130.23
- 129.92
- 129.82
- 129.71
- 129.50
- 129.43
- 129.13
- 128.84
- 128.74
- 128.67
- 128.53
- 101.84
- 101.29
- 100.92
- 98.59
- 77.48
- 77.23
- 76.98
- 71.30
- 71.07
- 70.60
- 69.62
- 69.47
- 69.33
- 68.39
- 67.91
- 67.53
- 66.52
- 63.04
- 61.52
- 60.14
- 55.39
- 54.49
- 52.80
- 49.06
- 22.55
- 22.36
- 21.31
- 20.89
- 20.84
- 20.73
- 20.70
- 20.67

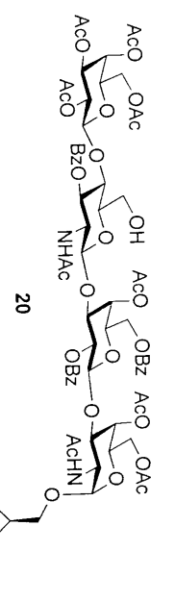

Current Data Parameters  
 NAME skk-11-amb-170-13c  
 EXPNO 5  
 PROCNO 1

F2 - Acquisition Parameters  
 Date\_ 20131213  
 Time 22.32  
 INSTRUM spect  
 PULPROG zgpg30  
 TD 65536  
 SOLVENT CDCl3  
 NS 1920  
 DS 4  
 SWH 29761.904 Hz  
 FIDRES 0.454131 Hz  
 AQ 1.1010048 sec  
 RG 1971.27  
 DM 16.800 usec  
 DE 4.50 usec  
 TE 298.3 K  
 D1 1.0000000 sec  
 D11 0.0300000 sec  
 TDO 1

==== CHANNEL f1 =====  
 SF01 125.7703637 MHz  
 NUC1 13C  
 P1 8.90 usec  
 PL1 103.0000000 W

==== CHANNEL f2 =====  
 SF02 500.1320005 MHz  
 NUC2 1H  
 CPDPRG12 waltz16  
 PCPD2 80.00 usec  
 PLW2 13.0000000 W  
 PLM12 0.34327999 W  
 PLM13 0.21969999 W

F2 - Processing parameters  
 SI 32768  
 SF 125.7577635 MHz  
 WDM 0  
 ZSR 2.00 Hz  
 GB 0  
 PC 1.40

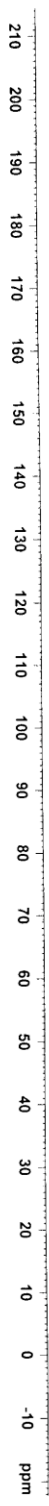

SSK-11-AMB-213-1H

NAME SSK-11-AMB-213-1H  
 EXPNO 2  
 PROCNO 1  
 Date\_ 20140426  
 Time\_ 16.31  
 INSTRUM spect  
 PROBHID 5 mm SEI 1H/D-  
 PULPROG zg30  
 TD 65536  
 SOLVENT D2O  
 NS 173  
 DS 0  
 SWH 8223.685 Hz  
 FIDRES 0.125483 Hz  
 AQ 3.9846387 sec  
 RG 161  
 DM 60.800 usec  
 DE 6.50 usec  
 TE 295.8 K  
 D1 1.00000000 sec  
 TD0 1

===== CHANNEL f1 =====  
 NUC1 1H  
 P1 6.75 usec  
 PL1 -3.00 dB  
 PL1W 16.73965454 W  
 SFO1 400.1324710 MHz  
 SI 32768  
 SF 400.1300107 MHz  
 WDW EM  
 SSB 0  
 LB 0.30 Hz  
 GB 0  
 PC 1.00

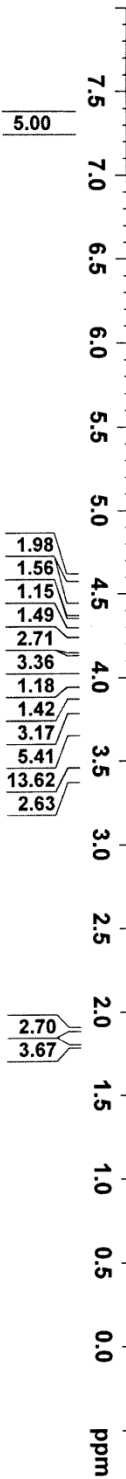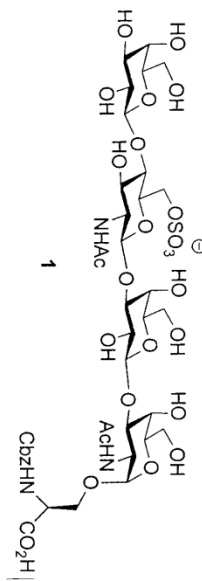

SKK-11-AMB-213-13C

Current Data Parameters  
 NAME SKK-11-AMB-213-13C  
 EXPNO 1  
 PROCNO 1

F2 - Acquisition Parameters

Date\_ 20140530  
 Time\_ 11:11  
 INSTRUM spect  
 PROBHD 5 mm PABBO BB/  
 PULPROG zgpg30  
 SOLVENT d2o  
 NS 6326  
 DS 16079  
 SFO1 207.1804 MHz  
 SF 207.1804 MHz  
 AQ 0.45413 sec  
 RG 1.010048 sec  
 DM 1.97127 sec  
 DE 16.800 usec  
 TE 295.7 K  
 D1 1.00000000 sec  
 D11 0.03000000 sec  
 D12 1.00000000 sec  
 D13 1.00000000 sec

==== CHANNEL f1 =====

SFO1 125.770357 MHz  
 SF 125.770357 MHz  
 PC1 8.90 usec  
 PL1 103.0000000 W  
 PLM1

==== CHANNEL f2 =====

SFO2 500.1320005 MHz  
 SF 500.1320005 MHz  
 NI 1H  
 NUC2 1H  
 CPDPRG12 waltz16  
 SFO3 125.770357 MHz  
 SF 125.770357 MHz  
 PC2 13.00000000 usec  
 PLM2 0.34327999 W  
 PLM3 0.21959999 W  
 PLM13

F2 - Processing parameters

SI 32768  
 SF 125.757890 MHz  
 WDM 0 EX  
 AS 0  
 DS 0  
 IB 2.00 Hz  
 GB 0  
 PC 1.40

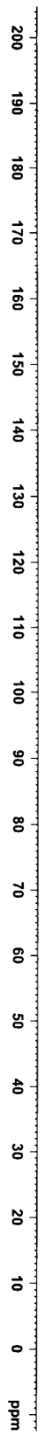

- 182.54
- 181.55
- 174.95
- 174.68
- 157.78
- 136.52
- 128.89
- 128.76
- 128.48
- 127.86
- 127.74
- 104.70
- 102.70
- 98.00
- 82.33
- 77.76
- 75.43
- 74.69
- 72.61
- 72.51
- 72.27
- 71.08
- 70.83
- 69.74
- 68.81
- 68.71
- 68.62
- 68.44
- 67.11
- 66.62
- 61.11
- 55.29
- 48.57
- 23.37
- 22.30
- 22.21
- 20.17

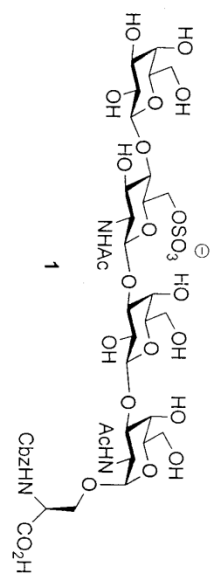

Supplement: c4ra12631a1.pdf [file c4ra12631a1.pdf]
